# Supplementary material
Source: publisher figshare collection journal article supplement (https://geolsoc.figshare.com/ndownloader/files/29062435)
Supplement: Supplementary file 1 [file 29062435]

## Sheet: Information
Supplemental Document 2 - Geochemical Data Tables
Transcrustal Magmatic Systems: Evidence from Andesites of the Southern Taupo Volcanic Zone
Journal of the Geological Society
Christopher Svoboda (Michigan State University); Tyrone Rooney (Michigan State University); Guillaume Girard (Northern Illinois University);
Chad Deering (Michigan Technological University)
Corresponding Author: Christopher Svoboda svoboda6@msu.edu
Geologically relevant elements were collected for all samples, but if all analyses were below the quantification limit, this element was omitted here.
Major elements are normalized to 100 wt % oxides during processing, but measured values that fall below the limit of reporting have been omitted here.
BDL within a cell indicates that the contents of that cell were below the limit of detection
Limit of detection is calculated as 3x the relative standard deviation of all gas blank measurements.
This variable originally quantified in counts per second is converted to a ppm after calibration against our standard reference materials.
The ppm quantity is then scaled to account for spot size differences between standard materials (110 μm spots) and samples (30 μm spots)
30 μm spots were utilized in this study

## Sheet: Table B1 - Whole Rock Data
Sample	SiO2(Wt%)	TiO2(Wt%)	Al2O3(Wt%)	FeOt(Wt%)	MnO(Wt%)	MgO(Wt%)	CaO(Wt%)	Na2O(Wt%)	K2O(Wt%)	P2O5(Wt%)	LOI (Wt%)	Sum	FeO(Wt%)*	Fe2O3(Wt%)*	Mg#**	Cr2O3(wt%)	Sc(ppm)	V(ppm)	Cr(ppm)	Co(ppm)	Ni(ppm)	Ga(ppm)	Rb(ppm)	Sr(ppm)	Y(ppm)	Zr(ppm)	Nb(ppm)	Cs(ppm)	Ba(ppm)	La(ppm)	Ce(ppm)	Pr(ppm)	Nd(ppm)	Sm(ppm)	Eu(ppm)	Gd(ppm)	Tb(ppm)	Dy(ppm)	Ho(ppm)	Er(ppm)	Tm(ppm)	Yb(ppm)	Lu(ppm)	Hf(ppm)	Ta(ppm)	Pb(ppm)	Th(ppm)	U(ppm)
Technique	XRF	XRF	XRF	XRF	XRF	XRF	XRF	XRF	XRF	XRF	XRF					recalculated from Cr	LA-ICP-MS	LA-ICP-MS	LA-ICP-MS	LA-ICP-MS	LA-ICP-MS	LA-ICP-MS	LA-ICP-MS	LA-ICP-MS	LA-ICP-MS	LA-ICP-MS	LA-ICP-MS	LA-ICP-MS	LA-ICP-MS	LA-ICP-MS	LA-ICP-MS	LA-ICP-MS	LA-ICP-MS	LA-ICP-MS	LA-ICP-MS	LA-ICP-MS	LA-ICP-MS	LA-ICP-MS	LA-ICP-MS	LA-ICP-MS	LA-ICP-MS	LA-ICP-MS	LA-ICP-MS	LA-ICP-MS	LA-ICP-MS	LA-ICP-MS	LA-ICP-MS	LA-ICP-MS
5021I	56.19	0.57	15.47	8.59	0.14	6.59	8.53	2.47	0.65	0.08	0.63	99.28	7.3015	1.432	64.1487	0.0573618	30.9648	216.072	195.873	32.0011	40.4097	16.5113	14.7118	405.166	14.3091	64.3533	2.52352	0.791634	140.773	7.10571	15.5723	1.95438	8.23359	2.04362	0.612252	2.22407	0.347954	2.42808	0.531249	1.59245	0.238823	1.66715	0.267096	1.81002	0.175008	3.33652	2.44578	0.592464
5021G-B	56.3	0.53	14.57	8.58	0.14	7.49	8.58	2.33	0.7	0.08	0.6	99.3	7.293	1.43033	67.0623	0.0734093	31.5526	204.39	250.671	33.724	49.9749	15.3443	15.5479	362.215	14.0282	60.9253	2.30594	0.808534	133.285	6.77743	14.4738	1.83822	7.67988	1.90069	0.575618	2.12137	0.340054	2.2891	0.486748	1.4526	0.22931	1.59594	0.262904	1.75538	0.163734	3.26712	2.35953	0.547301
5021F	55.82	0.54	14.42	8.72	0.14	7.93	8.27	1.88	0.64	0.08	1.42	98.44	7.412	1.45367	67.9593	0.111332	34.099	207.952	380.164	36.1158	58.9009	15.1317	15.1318	344.024	15.0923	64.4087	2.36859	0.776264	126.033	7.05951	14.9251	1.93559	8.03424	1.96544	0.60775	2.32081	0.37309	2.46684	0.547324	1.5915	0.252341	1.71375	0.284379	1.85479	0.165823	7.4149	2.46172	0.559428
5021E	56.45	0.54	14.92	8.45	0.14	6.89	8.74	2.48	0.61	0.08	0.6	99.3	7.1825	1.40866	65.538	0.0610499	31.7806	206.861	208.467	32.4035	42.7923	15.1085	10.776	383.156	14.6554	62.2094	2.33456	0.54424	133.948	6.80298	14.5986	1.85647	7.84866	1.95871	0.586745	2.07999	0.359759	2.39959	0.514765	1.51811	0.23653	1.65137	0.272568	1.76015	0.168268	3.85177	2.3784	0.55777
5021D	56.12	0.52	14	8.58	0.14	8.16	8.8	2.2	0.59	0.08	0.7	99.19	7.293	1.43033	68.9263	0.0944093	33.9353	184.851	322.379	35.3793	59.5975	15.0136	15.3578	362.785	14.1088	60.6561	2.20935	0.979721	128.283	6.67908	13.9897	1.81752	7.60355	1.90151	0.571356	2.19368	0.343954	2.33677	0.497434	1.53772	0.242718	1.64414	0.262343	1.74513	0.163537	3.29982	2.32434	0.492764
5021C	55.97	0.52	14.18	8.63	0.14	8.18	8.59	2.26	0.67	0.08	0.67	99.22	7.3355	1.43866	68.8543	0.0976803	31.7267	176.617	333.549	36.6084	64.289	14.8709	19.4026	368.652	14.2113	58.3803	2.22232	1.28448	129.721	6.79388	14.2859	1.83673	7.87947	1.95395	0.596678	2.16075	0.35827	2.35809	0.510617	1.51862	0.234037	1.64705	0.256675	1.70348	0.158142	2.66353	2.25584	0.500047
5021B	56.21	0.54	14.73	8.35	0.14	7.03	8.75	2.47	0.63	0.08	0.97	98.93	7.0975	1.39199	66.2575	0.0615467	31.2709	204.624	210.163	32.7961	44.1832	16.1145	12.1393	381.034	14.5055	60.7614	2.33809	0.714281	133.768	7.00645	14.9407	1.94436	8.02036	1.96921	0.600969	2.25746	0.367105	2.39335	0.52054	1.55006	0.239123	1.66162	0.258564	1.72924	0.163945	2.98879	2.35428	0.563613
5021A	56.12	0.55	14.88	8.44	0.14	6.7	8.79	2.45	0.68	0.08	1.07	98.83	7.174	1.40699	64.9307	0.0570334	30.4861	205.341	194.752	32.5436	38.1889	16.1545	15.2073	384.841	14.5419	62.0169	2.47125	0.666003	139.861	7.05526	15.3419	1.94357	7.99224	1.94479	0.62364	2.19284	0.358429	2.40967	0.515208	1.50406	0.231344	1.62535	0.259062	1.75	0.166602	12.0651	2.42162	0.553942
Detection Limit for LA-ICP-MS																	0.2	0.06	0.2	0.04	0.3	0.2	0.08	0.1	0.02	0.04	0.009	0.02	0.1	0.01	0.01	0.003	0.02	0.02	0.003	0.02	0.002	0.006	0.002	0.005	0.001	0.006	0.002	0.005	0.0009	0.02	0.002	0.003
Quality Control Information for major element XRF analysis.
JB-1a	52.76	1.27	14.47	9.02	0.15	7.89	9.36	2.79	1.43	0.26	0.4	99.4
JB-1a	52.66	1.27	14.46	9.05	0.15	7.89	9.37	2.8	1.43	0.26	0.46	99.34
JB-1a, GeoReM preferred value***	52.56	1.29	14.51	8.98755	0.1419	7.81	9.314	2.738	1.407	0.261
BHVO-1	49.76	2.72	13.62	12.23	0.17	7.21	11.34	2.21	0.52	0.27	0	100.05
BHVO-1	49.73	2.72	13.6	12.25	0.17	7.22	11.34	2.23	0.52	0.27	0	100.05
BHVO-1, GeoReM preferred value***	49.79	2.742	13.69	12.3094	0.1689	7.213	11.43	2.313	0.5256	0.2773
RGM-1	73.61	0.27	13.78	1.87	0.04	0.28	1.16	4.09	4.32	0.05	0.39	99.47
RGM-1, GeoReM preferred value***	73.12	0.2654	13.83	1.871	0.0387	0.284	1.178	4.086	4.293	0.0491
* Fe3+/FeƩ is calculated at 15% (after Kelley KA, Cottrell E (2009) Water and the oxidation state of subduction zone magmas. Science 325(5940):605-607)
** Mg# = calculated as (molar Mg/(molar Fe total+molar Mg)) of 100 wt % normalized samples
*** GeoReM preferred values were retrieved on March 31 2020, at http://georem.mpch-mainz.gwdg.de/sample_query_pref.asp, and correspond to the values reported in Jochum K.P. et al. (2016), Reference values following ISO guidelines for frequently requested rock reference materials, Geostandards and Geoananalytical research, DOI:10.1111/j.1751-908X.2015.00392.X
Detection limits were calculated as 3x the relative standard deviation of all gas blank measurements (which were collected after each standard and sample)

## Sheet: Table B2 - All Glasses
Sample	Analysis Day	Material	SiO2(Wt%)	TiO2(Wt%)	Al2O3(Wt%)	FeOt(Wt%)	MnO(Wt%)	MgO (Wt%)	CaO(Wt%)	Na2O (Wt%)	K2O(Wt%)	Cr2O3	FeO	Fe2O3	Mg #	Sc(ppm)	V(ppm)	Cr(ppm)	Co(ppm)	Ni(ppm)	Cu(ppm)	Zn(ppm)	Ga(ppm)	Rb(ppm)	Sr(ppm)	Y(ppm)	Zr(ppm)	Nb(ppm)	Cs(ppm)	Ba(ppm)	La(ppm)	Ce(ppm)	Pr(ppm)	Nd(ppm)	Sm(ppm)	Eu(ppm)	Gd(ppm)	Tb(ppm)	Dy(ppm)	Ho(ppm)	Er(ppm)	Tm(ppm)	Yb(ppm)	Lu(ppm)	Hf(ppm)	Ta(ppm)	Pb(ppm)	Th(ppm)	U(ppm)
Technique			LA-ICP-MS	LA-ICP-MS	LA-ICP-MS	LA-ICP-MS	LA-ICP-MS	LA-ICP-MS	LA-ICP-MS	LA-ICP-MS	LA-ICP-MS	recalculated from Cr	*	*	**	LA-ICP-MS	LA-ICP-MS	LA-ICP-MS	LA-ICP-MS	LA-ICP-MS	LA-ICP-MS	LA-ICP-MS	LA-ICP-MS	LA-ICP-MS	LA-ICP-MS	LA-ICP-MS	LA-ICP-MS	LA-ICP-MS	LA-ICP-MS	LA-ICP-MS	LA-ICP-MS	LA-ICP-MS	LA-ICP-MS	LA-ICP-MS	LA-ICP-MS	LA-ICP-MS	LA-ICP-MS	LA-ICP-MS	LA-ICP-MS	LA-ICP-MS	LA-ICP-MS	LA-ICP-MS	LA-ICP-MS	LA-ICP-MS	LA-ICP-MS	LA-ICP-MS	LA-ICP-MS	LA-ICP-MS	LA-ICP-MS
5021F Glom 1 dark area	1	Interstitial Glass	63.7317	1.10885	12.783	9.12917	0.14219	1.98241	5.85789	2.59262	2.50208	0.00143319	7.75979	1.52188	31.2909	26.0771	365.473	4.89681	23.3218	6.30413	17.5873	119.194	15.3081	36.9157	385.176	28.414	130.894	4.93609	2.1102	272.847	15.0368	29.5337	3.61142	16.3638	3.45756	1.06496	4.95626	0.769338	5.0476	1.03034	3.31752	0.475636	3.57684	0.448591	4.16755	0.441867	7.9504	5.22528	1.25592
5021F Trapped Melt 1	2	Interstitial Glass	61.8039	1.01114	12.9957	8.84186	0.138406	3.40384	7.01349	2.48489	2.1256	0.0408423	7.51558	1.47398	44.6707	36.4896	335.588	139.547	23.7816	17.1834	20.012	110.886	16.551	33.7756	344.831	31.0511	138.736	4.93471	1.40599	264.029	14.1155	27.8199	3.56368	16.3169	2.70877	1.16103	4.16864	0.765467	4.83089	0.962617	3.16106	0.431206	3.27592	0.445801	3.6417	0.408399	6.64471	5.32502	1.05554
5021F Trapped Melt 2	2	Interstitial Glass	63.6296	1.04241	13.9343	9.14395	0.136954	1.88007	5.59321	2.37369	2.18251	0.00146584	7.77235	1.52434	30.1288	26.3644	327.203	5.00838	20.7424	8.84631	65.5371	119.021	15.1127	33.9194	359.869	30.3308	141.799	4.84338	1.8765	270.039	15.253	28.9268	3.60763	16.5766	3.21257	0.923443	4.87728	0.703556	4.35265	0.992628	2.53558	0.46586	3.14274	0.49952	3.88991	0.403644	9.58366	5.74571	0.888017
5021F Trapped Melt 3	2	Interstitial Glass	63.5517	1.03219	14.006	8.99082	0.12664	1.83467	5.38951	2.44923	2.39641	0	7.64219	1.49881	29.97	25.6854	315.519	BDL	21.8874	6.26847	34.9982	107.954	19.5842	41.7869	331.823	31.725	133.504	5.8893	2.43693	256.566	16.0679	26.9703	3.50438	15.5015	3.84998	0.93523	3.89521	0.724468	4.71916	0.905082	2.91721	0.504372	2.89882	0.492055	4.11231	0.347227	9.73276	5.25407	1.05571
5021I Glom A Trapped Melt 1	2	Interstitial Glass	64.6152	1.09902	15.3701	7.07393	0.109121	1.32635	3.82657	4.53063	1.93388	0.00489466	6.01284	1.17926	28.224	25.2572	244.818	16.7237	14.6477	BDL	159.791	96.5904	21.316	56.9647	393.629	29.3044	147.713	6.07619	2.84358	415.4	16.7877	29.5573	3.72805	16.6248	4.85481	0.987601	4.4533	0.71482	4.81015	0.880639	2.83254	0.480129	3.21321	0.491762	4.1508	0.388348	8.83917	5.65897	1.04436
5021I Glom A Trapped Melt 2	2	Interstitial Glass	63.0689	1.07213	14.6886	8.36968	0.123038	1.87851	5.09043	4.26943	1.24809	0.00546829	7.11423	1.39527	32.0053	28.0381	300.954	18.6836	20.4219	4.63078	195.476	91.7029	16.1625	32.5284	408.815	26.8223	137.061	4.91264	1.27575	255.034	13.9416	25.4657	3.20028	16.5571	3.23735	0.95038	4.11205	0.618726	4.60713	0.843544	2.6243	0.457813	3.14666	0.486101	4.09293	0.298025	6.38002	5.99029	1.24421
5021I Glom A Trapped Melt 3	2	Interstitial Glass	63.1959	1.02155	13.5318	9.04582	0.130104	1.90133	5.86296	3.6668	1.50016	0.00224127	7.68895	1.50798	30.5946	26.2502	320.651	7.65778	21.1474	3.92865	271.038	124.281	18.9147	36.1282	397.993	25.6635	126.124	4.59918	2.04752	249.397	14.5276	27.7923	3.17483	15.7934	3.99465	0.945745	3.7949	0.694846	4.54728	1.045	2.99191	0.479236	3.07183	0.444218	3.58572	0.349064	6.55775	5.28765	1.03512
5021I Glom A Trapped Melt 4	2	Interstitial Glass	63.2072	0.955146	14.6388	7.81798	0.119251	1.9211	5.87994	3.94537	1.39479	0.0036445	6.64529	1.3033	34.0084	24.9884	279.442	12.4523	18.4641	4.86288	235.907	96.9468	18.1526	33.2252	431.465	28.1138	135.321	5.63871	1.4086	278.245	14.0083	27.2326	3.25643	15.809	2.82503	1.09399	4.24852	0.641466	4.81131	0.977241	2.95954	0.438153	3.1088	0.525383	3.96792	0.367456	6.63628	5.78028	1.07988
5021I Glom A Trapped Melt 5	2	Interstitial Glass	66.8034	0.806136	12.4889	7.54725	0.116554	2.56711	5.44803	3.46051	0.634203	0.0210748	6.41516	1.25816	41.6345	26.9798	257.722	72.0067	21.2861	13.6883	160.889	70.7344	15.9582	14.5544	354.619	21.109	112.537	2.77715	0.4835	205.339	11.0396	19.0615	2.85388	10.624	2.67587	0.914384	3.34219	0.5179	3.81326	0.802601	2.59046	0.450643	2.396	0.381439	3.50195	0.301057	3.84337	5.24358	0.777486
5021I Glom A Trapped Melt 6	2	Interstitial Glass	58.3415	0.52511	21.8011	4.86188	0.0629782	1.26605	9.44597	3.37739	0.294385	0.00327815	4.1326	0.810499	35.322	13.9014	169.729	11.2005	12.6	4.12168	76.3377	55.1172	22.2083	6.14278	573.931	13.419	59.4845	2.16555	0.827801	123.47	5.46296	10.0495	1.25389	5.96723	2.08096	0.556473	2.2115	0.375624	2.27953	0.509856	1.5742	0.245317	1.47916	0.224409	1.70107	0.145841	2.10793	2.57371	0.377274
5021I Glom B Trapped Melt 1	2	Interstitial Glass	67.5459	0.797498	12.8181	7.26882	0.116723	1.91784	3.85163	3.83474	1.70646	0.00766085	6.17849	1.21175	35.6226	22.3278	247.607	26.175	18.4502	8.41202	79.748	85.8996	11.6233	28.2243	331.533	23.4403	101.378	3.59495	1.08864	206.607	10.7249	21.5714	2.69511	11.8072	2.31153	0.890806	3.80226	0.565279	2.51672	0.767974	2.05617	0.39045	2.42884	0.664532	2.99222	0.207436	7.37303	4.36971	0.870383
5021I Glom B Trapped Melt 2	2	Interstitial Glass	64.725	1.00631	12.8146	7.95276	0.123191	2.07488	6.31456	3.29507	1.51036	0.0050483	6.75985	1.32577	35.3656	28.1289	316.096	17.2486	20.7421	16.7374	125.835	99.7767	15.8166	34.2244	359.772	31.292	139.981	5.28421	2.76493	222.153	14.3944	28.4535	3.85499	17.1225	3.17595	0.914052	4.35156	0.697406	4.55691	0.915227	3.00548	0.445977	3.40581	0.46487	3.38472	0.301061	6.81536	5.32878	1.10165
5021I Glom B Trapped Melt 3	2	Interstitial Glass	65.1282	0.958234	12.7336	7.86957	0.130561	1.59874	6.03569	3.66937	1.56619	0.00565097	6.68913	1.3119	29.8767	28.6327	283.89	19.3078	19.5588	7.62642	211.311	80.2572	19.4093	31.9049	316.514	30.2329	145.195	4.10156	2.38594	326.761	17.182	31.0805	3.98945	17.2205	3.58919	1.20369	3.74419	0.789861	4.13101	0.974111	2.95032	0.4929	3.2458	0.425542	3.90426	0.48863	9.19405	5.59494	0.986727
5021I Glom B Trapped Melt 4	2	Interstitial Glass	65.1312	1.07554	12.6556	8.35057	0.129008	1.70963	5.95045	3.42638	1.45037	0.00249178	7.09798	1.39208	30.039	23.1329	349.367	8.51371	21.4886	6.25295	284.555	94.3556	19.2207	32.9649	363.636	31.8543	139.013	5.40386	2.21076	246.739	16.168	28.0915	3.69407	17.7705	4.29211	1.1697	5.5715	0.74399	4.52865	0.998829	3.05744	0.536335	3.31154	0.509669	4.01918	0.427953	6.96304	5.28896	1.15545
5021I Glom B Trapped Melt 5	2	Interstitial Glass	65.0466	1.0123	13.364	8.29885	0.132929	1.75015	5.36073	3.50863	1.39916	0.00651342	7.05402	1.38346	30.6654	25.7525	319.417	22.2545	23.1569	4.40813	223.177	100.872	20.0178	36.0478	349.653	28.4503	148.739	4.64832	2.22041	268.383	15.7023	28.1628	4.06502	17.1497	3.85163	0.960083	4.07843	0.740792	4.86194	1.04532	2.92861	0.452519	2.98657	0.571056	4.62637	0.375455	8.36141	5.93462	1.28264
5021I Glom B Trapped Melt 6	2	Interstitial Glass	62.1113	0.763626	16.0722	7.04672	0.121033	3.16444	6.03696	3.46625	1.10675	0.0142723	5.98971	1.17472	48.501	21.8839	252.168	48.7646	19.7418	41.126	95.8619	46.9672	16.455	31.0507	421.604	22.203	101.895	3.96343	1.38652	211.42	10.4446	20.3432	2.70983	13.8519	2.59313	0.977267	3.49086	0.623074	4.01452	0.826106	2.1279	0.422867	2.96469	0.395389	3.3756	0.32403	6.28005	4.16394	0.694625
5021F Glass Spot 1	2	Groundmass Glass	57.776	0.438628	22.2155	4.75836	0.0709273	1.30162	10.2261	2.49951	0.568806	0.00405586	4.0446	0.793242	36.4559	13.8578	137.197	1.39604	12.5765	4.15232	2.65822	45.8794	17.3826	15.1468	604.156	12.334	55.0206	1.97275	0.940067	126.91	6.89021	11.9465	1.40146	6.71233	1.69231	0.685044	2.07999	0.296103	1.6853	0.492661	1.27772	0.215873	1.27715	0.207923	1.46828	0.0626236	3.18905	1.942	0.431383
5021F Glass Spot 2	2	Groundmass Glass	61.2349	0.709938	17.5328	7.52831	0.120337	2.71154	7.14484	1.96109	0.876661	0.00664346	6.39906	1.25501	43.0334	22.6989	238.331	5.40494	22.1876	12.1873	6.54686	79.3585	20.6329	28.8577	422.264	19.5816	96.6635	3.48211	1.21263	189.619	10.583	18.9187	2.39289	10.8192	3.5435	0.644506	3.17057	0.522435	3.20698	0.694008	2.17638	0.296731	2.36303	0.365014	2.50064	0.194802	4.63277	3.63572	0.830892
5021F Glass Spot 3	2	Groundmass Glass	59.4814	0.674367	19.6917	6.2383	0.095745	1.65484	9.14858	2.10809	0.768951	0.00529649	5.30255	1.03996	35.7476	18.0966	223.629	3.80134	17.9838	4.68708	2.42732	79.0851	17.7749	21.1185	510.355	19.4237	85.1832	2.85674	1.06919	175.609	9.85011	17.9967	2.35295	8.97784	2.44352	0.873443	2.60094	0.495796	3.23487	0.659766	1.92561	0.33953	2.00109	0.323007	2.09943	0.183447	4.71547	3.32669	0.660811
5021F Glass Spot 5	2	Groundmass Glass	62.2847	0.753164	14.6768	8.26912	0.132221	3.47442	7.37727	1.9722	0.873958	0.00832293	7.02875	1.3785	46.8433	28.4371	254.057	26.4	24.8235	14.8066	4.99015	100	15.4773	23.848	394.107	22.0361	100.355	3.82497	1.47207	188.469	10.8593	19.8605	2.73155	11.2101	2.35239	0.924785	3.69292	0.503625	3.2901	0.719956	2.31555	0.363105	2.53766	0.399458	3.07887	0.160406	4.97528	3.94668	0.902182
5021I Glass Spot 1	2	Groundmass Glass	58.9773	0.63756	18.3821	8.07367	0.132956	3.90502	6.12392	2.82783	0.776539	0.00724269	6.86262	1.34592	50.358	24.7462	211.347	6.45134	25.8409	18.2399	91.581	62.936	12.7238	21.4607	449.668	15.5911	84.9921	2.12769	1.25563	213.537	8.75254	17.1385	2.27373	10.1329	2.4207	0.719014	2.6513	0.480976	2.74228	0.530961	1.57195	0.299096	2.03446	0.314194	2.98594	0.197338	3.77443	3.26574	0.556333
5021I Glass Spot 2	2	Groundmass Glass	59.3079	0.581116	17.8287	6.77819	0.113157	3.24282	8.05972	3.09906	0.837262	0.00738348	5.76146	1.12996	50.085	25.2273	208.01	6.05922	22.8614	11.4277	83.2313	78.4011	16.9878	17.9647	448.649	15.2488	72.8736	3.12519	0.718429	163.545	8.90505	16.196	2.0139	8.93148	1.72199	0.798144	2.16777	0.353939	2.60192	0.550681	1.48614	0.251228	1.7734	0.308069	1.99297	0.225778	3.97797	3.00849	0.639951
5021I Glass Spot 3	2	Groundmass Glass	59.7351	0.699127	17.626	6.66142	0.100315	1.60408	8.89929	3.4204	1.1282	0.00728755	5.66221	1.11049	33.5565	24.8995	224.011	1.80689	16.1389	3.83596	54.5085	89.3117	19.1201	27.0321	488.29	23.992	99.0373	3.75132	1.38047	199.039	10.1272	21.7159	2.63427	12.3263	2.46685	0.905076	3.40062	0.483334	3.39599	0.712838	2.23519	0.305025	2.24622	0.361178	2.31921	0.216273	4.19552	3.99724	0.674723
5021I Glass Spot 4	2	Groundmass Glass	59.2378	0.58116	17.939	6.76937	0.111987	3.17964	7.97534	3.17121	0.876585	0.00627352	5.75397	1.12849	49.6256	21.4349	192.66	5.92058	23.658	8.99449	71.0069	84.0654	18.4732	19.7208	457.797	16.0065	73.1635	2.47465	1.13684	144.253	8.08575	15.5218	2.0221	7.40726	2.00171	0.617919	1.83244	0.410559	2.50844	0.575184	1.50359	0.285961	2.10683	0.237566	2.07708	0.202299	4.06793	2.94817	0.547751
5021I Glass Spot 5	2	Groundmass Glass	61.1422	0.731647	17.715	6.45945	0.10032	1.64526	7.88278	3.28948	0.947984	0.00716107	5.49053	1.07682	34.8195	24.4674	224.214	1.64809	17.3258	6.04687	110.14	91.2925	18.099	24.0007	447.241	20.0229	87.5342	3.7299	1.3685	201.137	10.3328	19.8226	2.44824	10.0099	2.24607	0.785472	2.57169	0.46764	3.04402	0.701773	2.09623	0.376195	2.15959	0.383851	2.58982	0.203955	4.57628	3.71485	0.724604
Detection Limit	1		1.6	0.0011	0.0066	0.022	0.00033	0.0033	0.11	0.011	0.0088					1.1	0.33	4.4	0.22	2.2	1.1	2.2	0.44	0.44	0.22	0.088	0.099	0.055	0.66	0.033	0.033	0.022	0.11	0.22	0.033	0.077	0.011	0.055	0.011	0.033	0.011	0.044	0.022	0.055	0.022	0.044	0.0044	0.088	0.022
Detection Limit	2		0.0885332	0.0013799	0.00109091	0.000609973	0.00271531	0.00095831	0.0751064	0.0233453	0.0712044					0.0904221	0.00162719	0.1386	0.00643252	0.342846	0.170111	0.039262	0.00041458	0.0139273	0.000819888	0.00817769	5.28638	0.0016858	0.00811622	0.000293663	0.00368667	0.00848955	0.0399368	0.0260571	0.0225395	0.027184	0.0132302	0.0123103	0.0113393	0.0460165	0.0426576	0.0927862	0.0104759	0.0288338	0.0284075	0.0206803	0.113588	0.0540152	0.0336936
* Fe3+/FeƩ is calculated at 15% (after Kelley KA, Cottrell E (2009) Water and the oxidation state of subduction zone magmas. Science 325(5940):605-607)
** Mg# = calculated as (molar Mg/(molar Fe total+molar Mg))
BDL = Below detection limit
Detection limits were calculated as 3x the relative standard deviation of all gas blank measurements (which were collected after each standard and sample)

## Sheet: Table B3 - Olivine
Sample	Analysis Day	Glomerocryst Number	SiO2(Wt%)	Al2O3(Wt%)	FeO(Wt%)	MnO(Wt%)	MgO (Wt%)	CaO(Wt%)	NiO(Wt%)	Fo#(mol%)	Sc(ppm)	V(ppm)	Cr(ppm)	Co(ppm)	Ni(ppm)	Zn(ppm)
Technique			LA-ICP-MS	LA-ICP-MS	LA-ICP-MS	LA-ICP-MS	LA-ICP-MS	LA-ICP-MS	recalculated from Ni		LA-ICP-MS	LA-ICP-MS	LA-ICP-MS	LA-ICP-MS	LA-ICP-MS	LA-ICP-MS
5021A Glom 2 A1	1	2	38.867	0.0274445	11.9672	0.178495	48.8381	BDL	0.121786	87.9159	3.25197	2.80028	168.338	173.459	956.972	87.1645
5021A Glom 2 A2	1	2	37.6677	0.0299374	13.4932	0.169556	48.4711	0.176061	0.107301	86.4938	3.70629	4.10982	181.594	156.017	843.147	75.9916
5021A Glom 2 A3	1	2	37.1694	0.011001	10.3425	0.155424	52.2218	BDL	0.127443	90.0014	3.55954	2.11484	134.53	156.345	1001.42	74.293
5021A Glom 2 A4	1	2	35.8562	0.0784887	10.9682	0.163011	52.7461	0.217649	0.113892	89.5541	3.71928	*	150.183	154.155	894.94	60.3449
5021A Glom 2 A5	1	2	40.1353	0.284244	11.8019	0.206755	47.3304	0.248558	0.132272	87.7292	3.50845	*	137.021	184.339	1039.37	111.886
5021A Glom 4 Core	1	4	38.6951	0.0342118	10.343	0.190753	50.697	BDL	0.116917	89.7311	4.20822	2.77862	135.455	176.53	918.711	101.533
5021C Glom 1 1	1	1	41.147	0.0228393	9.15476	0.180334	49.4502	0.130664	0.122899	90.5923	2.42492	3.97483	101.08	172.678	965.716	139.476
5021C Glom 1 2	1	1	41.0727	0.239443	14.2316	0.21427	44.0821	0.13167	0.126981	84.6672	3.13968	13.116	108.672	187.61	997.79	155.674
5021F Corona 4 1	1	Corona 4	40.9889	0.0111277	11.4297	0.169519	47.3867	BDL	0.151242	88.0825	3.24325	2.43328	176.947	172.064	1188.43	77.7165
5021F Corona 4 2	1	Corona 4	41.5067	0.015511	12.1865	0.177667	45.9775	BDL	0.169057	87.0566	3.92042	2.77033	216.136	183.126	1328.42	79.292
5021F Corona 4 Zoning Profile 1	1	Corona 4	41.5059	0.0175135	12.2012	0.173628	45.9432	0.126969	0.166193	87.0345	3.74988	2.80674	231.702	175.428	1305.91	84.0794
5021F Corona 4 Zoning Profile 2	1	Corona 4	41.9344	0.0117669	11.6701	0.167858	46.1805	BDL	0.162447	87.5847	4.1069	2.48859	208.209	179.075	1276.48	77.1099
5021F Corona 4 Zoning Profile 3	1	Corona 4	40.3924	0.0196021	10.946	0.162496	48.355	0.130782	0.152486	88.7329	3.59755	2.5455	205.29	169.561	1198.21	68.5044
5021F Corona 4 Zoning Profile 4	1	Corona 4	41.2324	0.0766184	12.044	0.17497	46.2806	0.176751	0.16639	87.2618	3.26164	3.66834	157.814	178.519	1307.46	69.5069
5021F Corona 4 Zoning Profile 5	1	Corona 4	42.1933	0.0943335	11.4422	0.16303	45.9526	0.183657	0.154558	87.7444	2.7401	2.98092	174.844	168.338	1214.48	59.9842
5021F Corona 4 Zoning Profile 6	1	Corona 4	41.3116	0.0106706	12.2477	0.181624	46.2033	0.135736	0.150749	87.0553	3.42844	2.49814	150.687	180.397	1184.56	84.0231
5021F Corona 2 1	1	Corona 2	40.5766	0.0157594	11.6386	0.16986	47.5032	BDL	0.154798	87.9172	2.82188	2.82254	183.797	176.606	1216.37	78.6651
5021F Corona 2 2	1	Corona 2	40.7788	0.0187037	12.0918	0.178574	46.7668	0.204568	0.153582	87.3337	4.25248	2.51021	215.629	175.166	1206.82	80.7543
5021F Corona 3 1	1	Corona 3	41.7324	0.00921719	13.0561	0.189219	44.8492	0.128615	0.129706	85.9627	3.73431	2.76415	150.254	180.643	1019.21	101.989
5021F Corona 3 2	1	Corona 3	41.022	0.0124997	12.9715	0.185368	45.6164	0.17438	0.154538	86.2434	4.32472	2.62266	180.001	182.29	1214.33	88.8427
5021GB Corona 1 1	1	Corona 1	41.8546	0.0141536	12.1752	0.181693	45.6922	BDL	0.138562	86.9968	3.17982	2.52587	154.263	181.317	1088.8	77.6781
5021GB Corona 1 2	1	Corona 1	41.3357	0.0141275	12.4136	0.18595	46.0042	BDL	0.143345	86.8537	3.95925	2.94195	140.559	180.722	1126.38	87.8109
5021GB Corona 1 3	1	Corona 1	41.6291	0.0167559	11.9492	0.179178	46.0825	0.123343	0.137787	87.3018	3.71438	2.66359	159.358	176.697	1082.71	80.7812
5021GB Corona 1 4	1	Corona 1	40.1724	0.0109095	12.0378	0.181503	47.4008	0.177859	0.139974	87.5308	4.32684	2.24147	154.858	178.983	1099.89	74.0708
5021GB Corona 1 Rim 4***	1	Corona 1	43.2879	0.573079	13.6321	0.211773	41.8279	0.431142	0.105354	84.5441	*	*	238.778	166.618	827.856	98.7856
5021GB Corona 2	1	Corona 2	42.8022	0.0479559	10.5606	0.15251	46.3545	BDL	0.19832	88.6687	2.61656	2.61407	218.036	172.894	1558.36	70.8917
5021GB Corona 2 Rim 1	1	Corona 2	43.1372	0.0155719	12.0274	0.169275	44.6343	BDL	0.167216	86.8694	3.24345	2.04615	124.125	178.003	1313.95	91.6927
Average of 3 analyses, NMNH olivine 11312-77			40.5715	0.0333671	9.59094	0.138649	49.56	0.0857707	0.364795		2.34919	4.22134	97.7201	143.945	2866.49	54.7973
NMNH olivine 11312-77, accepted value			40.81		9.55	0.14	49.42								2907
Detection Limit	1		1.6	0.0066	0.022	0.00033	0.0033	0.11			1.1	0.33	4.4	0.22	2.2	2.2
*Outlier, Sc and V are too high - possible inclusion in analysis.

## Sheet: Table B4- Clinopyroxene
Sample	Analysis Day	Sample No.	Glomerocryst No.	Group	SiO2(Wt%)	TiO2(Wt%)	Al2O3(Wt%)	FeO(Wt%)	MnO(Wt%)	MgO (Wt%)	CaO(Wt%)	Na2O (Wt%)	Cr2O3(Wt%)	Mg# (Mol%)	Sc(ppm)	V(ppm)	Cr(ppm)	Co(ppm)	Ni(ppm)	Zn(ppm)	Ga(ppm)	Sr(ppm)	Y(ppm)	Zr(ppm)	La(ppm)	Ce(ppm)	Pr(ppm)	Nd(ppm)	Sm(ppm)	Eu(ppm)	Gd(ppm)	Tb(ppm)	Dy(ppm)	Ho(ppm)	Er(ppm)	Tm(ppm)	Yb(ppm)	Lu(ppm)
Technique					LA-ICP-MS	LA-ICP-MS	LA-ICP-MS	LA-ICP-MS	LA-ICP-MS	LA-ICP-MS	LA-ICP-MS	LA-ICP-MS	recalculated from Cr		LA-ICP-MS	LA-ICP-MS	LA-ICP-MS	LA-ICP-MS	LA-ICP-MS	LA-ICP-MS	LA-ICP-MS	LA-ICP-MS	LA-ICP-MS	LA-ICP-MS	LA-ICP-MS	LA-ICP-MS	LA-ICP-MS	LA-ICP-MS	LA-ICP-MS	LA-ICP-MS	LA-ICP-MS	LA-ICP-MS	LA-ICP-MS	LA-ICP-MS	LA-ICP-MS	LA-ICP-MS	LA-ICP-MS	LA-ICP-MS
5021A Glom1 1	1	5021A	1	Low Al	54.9619	0.165	1.44565	6.54168	0.185248	17.153	19.3986	0.172903	0.218309	82.3684	77.7291	180.173	1493.68	47.2788	143.465	36.987	2.05553	23.8194	7.59472	2.98676	0.259837	1.03377	0.272943	1.683	1.01648	0.273551	0.66212	0.213256	1.58805	0.33212	1.04926	0.103852	0.923638	0.129412
5021A Glom1 2	1	5021A	1	Hi Al	53.1554	0.178729	2.05502	6.40979	0.169289	17.7812	20.16	0.190378	0.25787	83.1717	90.3604	224.128	1764.35	45.5895	132.459	33.0471	3.41555	26.8595	8.28349	4.84017	0.294691	1.51407	0.329739	1.6845	0.907518	0.382831	1.14283	0.2596	1.60012	0.322447	1.09958	0.139196	0.79326	0.131783
5021A Glom1 5 Rim	1	5021A	1	Hi Al	53.4119	0.226405	2.4983	6.14117	0.162353	16.0147	21.2744	0.204344	0.314102	82.2886	104.923	247.698	2149.09	44.6841	136.781	33.9956	2.56518	26.5585	9.55646	6.4788	0.580448	1.76943	0.35983	1.70587	1.12414	0.16829	1.55268	0.318981	1.81806	0.464314	1.07764	0.158875	0.993188	0.155113
5021A Glom1 5 Core	1	5021A	1	Low Al	53.8113	0.15444	1.44838	6.68427	0.188604	17.0043	20.5873	0.148847	0.155701	81.9246	90.605	181.827	1065.31	47.9184	124.795	38.1515	2.2996	23.1082	8.07315	3.63537	0.263725	1.33173	0.276603	2.11096	0.983783	0.358399	1.04046	0.214266	1.48845	0.313137	0.812997	0.129115	0.838007	0.120701
5021A Glom1 6	1	5021A	1	Hi Al	53.9476	0.199092	2.41711	5.84185	0.155306	16.3846	20.8438	0.218104	0.523442	83.3249	103.697	240.872	3581.4	41.4071	137.428	33.0068	3.24226	28.0468	9.75789	5.43484	0.313408	1.6681	0.23461	1.71663	1.42524	0.287377	1.39514	0.271883	1.79944	0.329873	1.07819	0.135224	0.920427	0.145299
5021A Glom 2 2	1	5021A	2	Hi Al	53.9171	0.235829	2.46582	6.73991	0.175433	17.0943	19.1256	0.235633	0.302699	81.8799	96.3538	244.154	2071.08	47.8677	155.688	44.9933	4.58519	27.0544	8.22206	5.75995	0.461762	1.69529	0.31598	1.95686	0.58134	0.289848	1.32798	0.225294	1.64521	0.362974	1.06811	0.172716	0.893744	0.179041
5021A Glom 3 1	1	5021A	3	Hi Al	53.839	0.214111	2.1024	6.59841	0.172954	17.0793	19.7676	0.185312	0.297085	82.1797	103.45	211.783	2032.66	46.1721	129.158	34.4709	3.94959	23.668	9.16772	5.55254	0.364136	1.36034	0.325583	1.86049	0.792651	0.381146	1.12612	0.225056	1.69606	0.384931	1.24777	0.122381	0.989548	0.102044
5021A Glom 3 3	1	5021A	3	Hi Al	53.3416	0.176106	1.90901	6.29491	0.168596	16.8085	21.1996	0.206645	0.233679	82.6307	86.7723	211.821	1598.84	45.2592	130.111	60.9543	3.21358	30.6697	7.19752	4.20578	0.468613	1.46894	0.333707	1.58831	0.372284	0.210002	0.870327	0.209139	1.58942	0.261921	0.694497	0.102815	0.650065	0.105133
5021A Glom 3 5	1	5021A	3	Low Al	54.3594	0.144587	1.51486	6.28662	0.178571	17.2753	19.9758	0.169783	0.195222	83.0389	78.2819	172.283	1335.71	47.0848	141.507	36.5934	2.33513	21.1304	7.01354	2.77811	0.420878	1.01329	0.271861	2.10636	0.691646	0.306012	0.801288	0.23026	1.2722	0.324218	0.917057	0.0846427	0.723099	0.100527
5021A Glom 3 6	1	5021A	3	Low Al	53.4147	0.162003	1.71096	6.66747	0.191218	17.3233	20.355	0.193366	0.208824	82.2349	74.6467	181.582	1428.78	48.0426	142.912	35.011	2.23034	22.2022	7.64364	2.91023	0.310394	1.12108	0.22193	1.95988	0.548967	0.296785	1.24982	0.192772	1.51545	0.281278	0.804585	0.133172	0.881142	0.0876552
5021A Glom 3 7	1	5021A	3	Hi Al	53.4553	0.227806	2.57058	6.41322	0.161769	16.4779	20.4833	0.212147	0.251573	82.0714	94.931	260.095	1721.27	45.5135	129.788	32.7552	5.09109	25.2215	8.54859	5.44918	0.388731	1.87055	0.384823	2.50254	0.928574	0.331743	1.57535	0.274778	1.93605	0.400007	1.16508	0.108814	0.825146	0.155092
5021A Glom 3 8	1	5021A	3	Hi Al	53.2403	0.236209	2.41256	6.35077	0.162102	16.3951	20.9998	0.210299	0.262394	82.1412	89.649	248.804	1795.31	43.4157	128.402	34.5897	4.43484	26.9107	8.74451	5.32434	0.397373	1.60045	0.398748	2.10756	1.38891	0.361278	1.48755	0.29136	1.91515	0.363331	1.08526	0.119947	0.750949	0.155621
5021A Glom 4 5	1	5021A	4	Hi Al	54.0303	0.210009	2.12705	6.86373	0.182203	16.732	19.6904	0.192492	0.274465	81.2845	98.5497	211.143	1877.9	46.8951	148.789	32.8997	3.12496	24.2576	8.6407	5.28005	0.358284	1.25934	0.249605	2.15861	0.75322	0.252818	1.6584	0.276818	1.41079	0.338508	1.11054	0.114196	0.972028	0.147668
5021A Glom 4 7	1	5021A	4	Hi Al	53.41	0.200642	2.26257	6.61829	0.175467	16.7812	20.265	0.215848	0.286659	81.8758	97.1001	233.348	1961.33	43.7493	129.434	26.9975	3.24005	24.2911	8.39933	3.4459	0.365912	1.37417	0.295543	2.20787	0.775341	0.318401	0.911078	0.246861	1.57657	0.368378	1.03465	0.13443	0.818119	0.177821
5021A Glom 4 8	1	5021A	4	Hi Al	53.7577	0.230076	2.21829	6.80595	0.176711	16.6298	19.9421	0.214026	0.210558	81.3199	94.7144	253.697	1440.65	46.8025	123.523	43.6684	3.94735	23.8044	8.95662	5.03197	0.36924	1.5312	0.281744	2.22765	0.481267	0.31048	1.19047	0.239901	1.66741	0.352166	0.921885	0.143929	0.954595	0.142715
5021A Glom 4 9	1	5021A	4	Low Al	55.0859	0.143133	1.44975	5.70771	0.167708	17.2983	19.9774	0.168156	0.268306	84.374	73.9133	167.951	1835.76	43.9548	150.255	32.5882	2.53528	21.6432	6.34988	2.78986	0.312005	1.17577	0.208359	1.72891	0.835212	0.287864	0.895851	0.190884	1.18042	0.299579	0.74272	0.124743	0.574972	0.0950228
5021A Glom 5 5	1	5021A	5	Low Al	54.3434	0.171879	1.73746	6.71196	0.185636	17.1027	19.575	0.18414	0.164837	81.9487	85.2969	210.339	1127.82	45.0546	125.61	37.4635	3.05551	21.6357	7.7012	3.62534	0.280868	1.24753	0.319657	1.57923	0.713307	0.343761	1.26584	0.201398	1.52619	0.423522	1.09326	0.135392	0.76473	0.103225
5021C Glom 1 3	1	5021C	1	Hi Al	54.2182	0.233711	2.83237	6.83663	0.187449	17.3055	18.0043	0.354097	0.255441	81.8507	101.342	247.284	1747.74	49.3717	128.449	36.6969	3.83976	32.2112	10.5856	7.90469	0.58222	1.96805	0.341906	2.22873	0.836409	0.380672	1.5165	0.317144	1.97541	0.382231	1.26557	0.125327	0.918251	0.193482
5021C Glom 1 4	1	5021C	1	Hi Al	53.2668	0.25063	2.75779	6.59868	0.166146	15.9688	20.7505	0.217124	0.320372	81.1731	101.574	265.227	2191.99	44.7094	131.605	32.4734	4.70744	24.965	9.67662	6.64779	0.371021	1.83652	0.359489	2.1569	0.821532	0.348404	1.91617	0.245826	2.0657	0.440755	1.37212	0.171654	0.977617	0.143503
5021C Glom 1 5	1	5021C	1	Hi Al	52.8537	0.220474	2.63813	6.52922	0.165342	16.0358	21.3906	0.221578	0.218776	81.3978	110.911	270.155	1496.87	45.7115	124.799	30.6697	3.07262	28.0731	10.2941	6.0852	0.458487	1.63164	0.357615	1.94579	1.18873	0.376257	1.7933	0.326831	1.85648	0.431578	1.19242	0.195375	1.0546	0.147047
5021C Glom 1 6	1	5021C	1	Hi Al	53.1743	0.255285	2.44509	6.63538	0.174638	16.8722	20.2527	0.211865	0.327457	81.9177	102.095	233.488	2240.47	45.6951	123.133	29.3817	4.59324	22.7374	9.03134	6.35577	0.384543	1.43439	0.281727	1.57462	1.06017	0.289816	0.967093	0.252333	1.89124	0.35011	1.13825	0.134609	0.859748	0.119095
5021C Glom 1 7	1	5021C	1	Low Al	54.1972	0.152292	1.73141	5.6712	0.162965	17.8863	19.9769	0.195929	0.522134	84.8922	85.4484	157.471	3572.46	42.3359	121.798	29.3195	2.4845	24.2337	7.08091	3.3952	0.241311	0.963693	0.193231	1.31229	0.672907	0.306119	1.02059	0.214059	1.30565	0.286982	0.766276	0.100553	0.632932	0.117733
5021C Glom 1 8	1	5021C	1	Low Al	54.6264	0.113847	1.05357	5.79936	0.181112	18.3409	19.7522	0.129706	0.334889	84.9274	84.0895	128.026	2291.32	44.3599	107.891	26.518	1.28157	15.933	6.61414	2.14699	0.119425	0.549098	0.115366	1.27581	0.45035	0.246771	1.27833	0.154049	1.29518	0.312652	0.9624	0.0922384	0.793438	0.101991
5021C Glom 1 9	1	5021C	1	Hi Al	53.0885	0.263723	2.54078	6.88345	0.176348	16.1564	20.6461	0.195972	0.221951	80.7015	109.216	243.695	1518.59	47.3236	125.982	29.3269	3.6746	24.9902	10.8024	5.46892	0.40656	1.49203	0.34352	2.48811	1.15726	0.499062	1.67571	0.260162	2.02651	0.488828	1.20053	0.215047	0.997991	0.134178
5021C Glom 1 10	1	5021C	1	Hi Al	53.8203	0.231769	2.32163	6.23409	0.163518	16.2464	20.7737	0.2054	0.271807	82.2791	100.596	238.368	1859.71	45.5554	134.652	28.8664	3.5675	25.209	9.56573	5.89071	0.475639	1.37094	0.287428	2.41989	1.05942	0.346724	1.0614	0.25875	1.83349	0.425327	1.05855	0.135083	0.950044	0.116254
5021C Glom 1 11	1	5021C	1	Hi Al	53.4356	0.240936	2.52758	6.4748	0.154441	15.7537	21.2442	0.202148	0.23775	81.2553	122.411	261.529	1626.69	45.6462	129.68	27.5116	3.39746	27.5108	11.4002	6.5986	0.579428	1.80182	0.509875	2.74285	1.12762	0.381976	1.92438	0.325932	2.06526	0.46867	1.20217	0.184508	1.12289	0.139131
5021C Glom 2 4	1	5021C	2	Hi Al	53.3305	0.177336	1.91742	6.51916	0.178444	17.6993	19.9234	0.187085	0.241486	82.8681	93.7245	205.484	1652.25	47.5747	135.319	30.6739	2.46776	22.1691	8.63446	3.96455	0.258041	1.21913	0.294071	2.02951	1.17107	0.36784	1.42463	0.282609	1.47365	0.35033	1.07181	0.166511	0.84726	0.128333
5021C Glom 2 5	1	5021C	2	Low Al	54.127	0.170946	1.71798	6.31007	0.174754	16.6664	20.6337	0.174707	0.185891	82.4737	84.4404	195.922	1271.87	45.5466	127.469	35.7678	2.43596	22.8149	8.0577	3.57881	0.271442	1.03667	0.321759	1.64065	0.912326	0.263124	0.858064	0.189679	1.31351	0.318048	0.858349	0.0947833	0.84226	0.110294
5021C Glom 2 7	1	5021C	2	Hi Al	53.7949	0.235225	2.46158	7.0159	0.181491	16.4117	19.6986	0.20371	0.210663	80.6488	100.948	253.884	1441.36	49.3612	124.547	37.2504	4.54438	23.4291	8.53672	5.71755	0.403093	1.25102	0.318156	2.24937	1.15251	0.326855	1.42684	0.291139	1.71008	0.375428	1.22928	0.154827	1.0583	0.153421
5021C Glom 2 8	1	5021C	2	Low Al	54.1262	0.132468	1.22976	5.09938	0.149387	17.6745	21.3488	0.166066	0.403018	86.0631	69.3992	133.892	2757.46	38.2203	121.244	24.4601	1.25692	25.7494	4.75592	1.89357	0.262946	0.889641	0.231771	1.33375	0.562328	0.220279	0.77995	0.118363	0.738292	0.172721	0.575273	0.0652402	0.539792	0.0585522
5021C Glom 3 2	1	5021C	3	Low Al	54.2496	0.176931	1.60568	6.67357	0.181619	16.9788	19.953	0.164559	0.146575	81.926	86.9493	199.634	1002.87	45.9553	124.308	32.2693	1.62334	21.0346	8.61435	2.65707	0.234889	1.12252	0.281334	1.89249	0.758769	0.268021	1.23579	0.248871	1.44118	0.358356	0.930678	0.12997	0.861263	0.10635
5021C Glom 3 4	1	5021C	3	Hi Al	53.8555	0.171352	1.98251	5.33292	0.150228	17.3009	21.042	0.204221	0.711613	85.2506	84.2777	182.304	4868.88	39.1035	128.863	22.3543	2.69738	24.4366	7.03286	3.75585	0.194691	0.957429	0.175964	1.10259	0.649131	0.287238	0.992614	0.195001	1.31613	0.236336	0.731139	0.0891059	0.713617	0.0873633
5021C Glom 3 5	1	5021C	3	Hi Al	53.9209	0.202731	2.07187	6.72692	0.178403	16.4629	20.1843	0.20025	0.166856	81.3441	98.249	228.498	1141.64	47.7098	123.011	35.2544	4.28087	25.7351	9.64444	4.85789	0.474118	1.50437	0.371732	2.5118	1.41606	0.294504	1.16982	0.259839	1.8256	0.355039	1.14902	0.14758	1.02279	0.131539
5021C Glom 3 6	1	5021C	3	Hi Al	52.9677	0.221367	2.65857	6.09001	0.151389	16.3332	21.3551	0.217463	0.378767	82.6939	109.295	262.093	2591.53	43.0538	124.199	29.9729	3.35709	28.4134	10.3444	6.68801	0.486404	1.96568	0.447165	3.32058	1.56421	0.347919	1.41061	0.289908	2.17342	0.431131	1.26907	0.158497	1.04273	0.12545
5021C Glom 3 7	1	5021C	3	Low Al	54.8534	0.108045	1.61441	4.26455	0.12881	17.2375	21.4438	0.251987	0.568427	87.8071	49.1318	104.458	3889.2	35.2232	118.711	24.2431	1.6987	42.9292	3.92692	3.71283	0.414541	1.17234	0.161272	1.38469	0.634357	0.106612	0.520372	0.0984568	0.870065	0.174561	0.559111	0.0810161	0.329793	0.0618429
5021C Glom 3 8	1	5021C	3	Low Al	54.9625	0.178798	1.70024	5.19456	0.141036	16.513	21.1174	0.178575	0.379874	84.9932	87.0793	183.798	2599.11	39.4885	89.9075	24.0953	2.8814	29.7806	7.06506	3.94678	0.389798	1.50055	0.309236	2.49436	1.2239	0.288106	0.901408	0.188923	1.43365	0.260073	0.774744	0.108624	0.745724	0.132065
5021C Glom 3 9	1	5021C	3	Hi Al	53.6324	0.208054	2.01389	6.84046	0.183478	16.8544	20.0906	0.18672	0.161082	81.4465	87.7863	216.675	1102.13	47.4912	119.872	33.912	3.48726	22.5404	8.25367	4.43415	0.361378	1.29304	0.27714	1.91308	0.746239	0.344611	1.09154	0.228198	1.75731	0.357444	0.924581	0.103866	0.960208	0.107844
5021C Glom 3 11	1	5021C	3	Low Al	53.8888	0.166349	1.65938	6.61459	0.177766	16.9827	20.3093	0.156366	0.163814	82.0605	89.0092	187.738	1120.82	44.4866	126.898	30.1052	2.97527	21.9566	8.32931	3.92444	0.290724	1.13072	0.234391	1.75543	0.832657	0.348697	1.0384	0.237495	1.75315	0.304557	0.906084	0.124869	0.896299	0.117996
5021C Glom 3 12	1	5021C	3	Low Al	54.2558	0.148446	1.37216	6.1126	0.177239	17.4255	20.312	0.165226	0.213801	83.5499	70.9328	166.882	1462.84	44.9084	144.22	35.1927	1.8878	23.0897	6.04924	1.85737	0.198102	0.810024	0.177082	1.22198	0.765792	0.220822	0.786069	0.162125	1.26756	0.246892	0.650989	0.0984916	0.677449	0.0748722
5021C Glom 3 13	1	5021C	3	Low Al	54.5789	0.136557	1.34097	5.46477	0.170858	17.8864	20.2593	0.16369	0.365135	85.3617	77.2489	146.154	2498.26	43.1288	125.125	26.1244	2.40431	22.6982	5.9607	2.56876	0.248377	0.846869	0.199088	1.41664	0.397516	0.223174	0.712244	0.124517	1.26817	0.254942	0.617905	0.110092	0.633033	0.130595
5021C Glom 3 14	1	5021C	3	Low Al	54.443	0.185348	1.70216	6.42114	0.179842	16.8268	20.0299	0.172142	0.1528	82.3597	83.0716	188.632	1045.46	44.7609	133.747	37.0714	3.0701	23.2841	7.25634	3.99749	0.228175	1.15297	0.25749	1.69443	0.998117	0.238357	1.04346	0.207139	1.34719	0.274778	0.878585	0.135828	0.801458	0.130688
5021C Glom 3 16	1	5021C	3	Hi Al	54.2923	0.233446	2.36045	5.89972	0.147527	15.9811	20.8982	0.197635	0.261036	82.8358	107.56	250.756	1786.02	42.6728	126.343	29.2398	4.12682	31.103	10.7547	7.60803	0.5439	2.30843	0.485992	2.83833	1.1418	0.329178	1.30341	0.311175	2.04377	0.42491	1.14838	0.168166	0.990212	0.1913
5021C Glom 3 17	1	5021C	3	Hi Al	52.859	0.267979	2.4918	6.38623	0.164847	16.3644	21.2255	0.184601	0.224814	82.0317	119.928	258.602	1538.18	46.3245	118.578	28.277	3.96668	30.9225	12.0772	7.7635	0.57611	2.11896	0.443294	3.34186	1.11145	0.403934	1.63638	0.333774	2.0467	0.435604	1.27434	0.164491	1.15641	0.154621
5021C Glom 3 18	1	5021C	3	Hi Al	54.3709	0.218532	2.04165	6.03557	0.158495	16.3695	20.5608	0.178825	0.280946	82.8536	100.304	216.578	1922.24	45.216	120.456	27.4868	2.87501	26.5294	9.3181	5.0856	0.32529	1.49697	0.338042	2.68838	1.02511	0.345365	1.4841	0.236776	1.81191	0.340603	1.08505	0.130366	0.766054	0.113711
5021C Glom 3 19	1	5021C	3	Low Al	55.6877	0.143183	1.36756	6.0712	0.177154	17.2034	19.1592	0.156948	0.207344	83.4669	79.1118	165.988	1418.66	44.8998	129.588	33.0325	1.82478	20.8395	6.77466	3.0507	0.342552	0.96555	0.156164	2.06067	0.748697	0.144953	0.819579	0.193588	1.41912	0.324327	0.829279	0.106274	0.67486	0.114778
5021C Glom 4 4	1	5021C	4	Hi Al	52.6739	0.266799	2.70443	6.43697	0.160727	16.3005	21.2542	0.19674	0.258011	81.8568	105.751	275.697	1765.32	43.2595	118.863	27.5994	3.93705	26.0154	10.5081	6.28595	0.400308	1.89217	0.329966	2.47199	1.20668	0.370339	1.48654	0.277795	2.16113	0.41485	1.02516	0.126579	1.09015	0.145145
5021C Glom 4 5	1	5021C	4	Low Al	52.9995	0.15013	1.52761	6.32623	0.179183	17.3329	21.2778	0.170488	0.166187	82.9973	77.8239	174.407	1137.06	46.7301	128.667	31.4979	1.25001	20.2684	6.38375	2.93074	0.223344	1.0121	0.252495	1.42768	0.713992	0.233726	0.723535	0.18171	1.3825	0.283592	0.709677	0.100011	0.763205	0.0999676
5021C Glom 4 7	1	5021C	4	Hi Al	52.071	0.260061	2.75681	6.6783	0.159792	16.072	21.7591	0.201046	0.185646	81.0882	119.532	288.666	1270.19	44.2541	114.061	31.4163	4.23289	28.0204	11.3943	7.72652	0.469209	2.14846	0.412797	2.86095	1.38683	0.471923	1.47399	0.336267	2.08625	0.453985	1.23738	0.146186	1.15129	0.144876
5021C Glom 4 8	1	5021C	4	Hi Al	53.73	0.203327	2.12256	5.74512	0.147775	16.7924	21.0779	0.190159	0.370991	83.8905	94.5656	222.483	2538.33	43.0381	140.96	25.8626	2.84938	28.2689	8.30937	4.87335	0.292249	1.69285	0.296304	2.35792	1.11545	0.308258	1.18461	0.219532	1.48275	0.30873	0.986047	0.106853	0.819907	0.135866
5021C Glom 4 9	1	5021C	4	Hi Al	53.2576	0.203852	2.17026	6.31416	0.171363	16.673	21.0499	0.195132	0.260923	82.4701	90.2322	220.604	1785.24	44.8155	134.079	29.2678	3.05387	25.293	8.1967	4.92438	0.376527	1.41382	0.322895	2.08948	0.746688	0.310692	1.22436	0.214296	1.53237	0.308012	0.893671	0.125931	0.902594	0.114759
5021C Glom 4 11	1	5021C	4	Low Al	53.7041	0.155384	1.46098	6.13742	0.177128	17.3879	20.8075	0.148127	0.154102	83.4644	89.8236	173.439	1054.37	46.7006	134.128	28.8961	2.13827	22.3918	7.74808	3.35122	0.343756	1.37285	0.219585	2.17855	0.588347	0.230477	1.29038	0.226293	1.2646	0.269864	0.86397	0.107352	0.663656	0.114633
5021C Random 1	1	5021C	n/a	Low Al	55.0002	0.148257	1.62195	5.01372	0.140337	16.9522	20.8704	0.192887	0.456494	85.7631	81.9855	167.779	3123.35	37.676	116.337	24.2775	3.27863	27.7377	6.08126	2.85928	0.415137	1.2109	0.303574	1.91429	0.609741	0.183692	1.07447	0.10651	1.22909	0.227797	0.674357	0.0993671	0.621667	0.0680493
5021C Random 2	1	5021C	n/a	Low Al	54.6	0.182041	1.74562	6.69528	0.184178	17.072	19.333	0.172962	0.195047	81.9589	86.7645	193.901	1334.52	45.0073	138.318	37.3746	3.50963	21.0053	8.11899	3.59885	0.322411	1.25863	0.244859	1.34406	0.944687	0.311805	1.26479	0.235496	1.39946	0.291487	1.02331	0.113774	0.727586	0.0980315
5021F Corona 1 1	1	5021F	Corona 1	Hi Al	53.5269	0.233318	2.55315	6.94166	0.175331	16.2446	20.1959	0.197475	0.165256	80.6551	111.455	250.415	1130.68	46.44	122.308	35.9951	3.59671	23.2527	9.29907	5.87893	0.259872	1.48053	0.346411	2.10454	0.731681	0.32876	1.08652	0.300431	2.00412	0.36405	1.07444	0.184555	1.28479	0.140059
5021F Corona 1 2	1	5021F	Corona 1	Hi Al	53.7023	0.272267	2.79286	6.77683	0.163452	16.077	19.9412	0.227712	0.286604	80.8673	103.183	275.838	1960.95	45.2375	128.923	30.6788	2.77139	26.7338	10.1401	6.68728	0.426319	1.84041	0.395552	2.25711	1.17655	0.359866	1.47363	0.265236	2.09085	0.407895	1.04592	0.184562	1.2148	0.12771
5021F Glom 1 1	1	5021F	1	Hi Al	53.3274	0.228507	2.46516	6.87027	0.181517	16.5043	20.2441	0.202504	0.295556	81.0606	107.808	238.556	2022.2	47.8985	140.983	34.4901	3.12369	21.9739	10.219	5.79885	0.447879	1.52454	0.339345	1.71844	0.661368	0.365343	1.33566	0.221463	1.92623	0.34771	1.22734	0.168699	1.23514	0.145928
5021F Glom 1 2	1	5021F	1	Hi Al	53.4712	0.224095	2.60448	6.1415	0.155702	15.8143	21.3774	0.214448	0.336514	82.1035	111.864	256.7	2302.44	45.4761	133.366	33.6476	4.67068	25.9269	10.2721	6.04743	0.479343	1.45339	0.252158	2.8406	1.14028	0.353064	1.2858	0.259397	2.3319	0.40459	1.17714	0.139953	1.09172	0.15389
5021F Glom 1 3	1	5021F	1	Low Al	54.2809	0.161047	1.55303	6.57214	0.189724	16.9546	20.1183	0.162503	0.185454	82.1308	85.1964	182.627	1268.88	48.08	143.83	34.179	3.83255	20.541	7.93601	2.50307	0.262044	1.10064	0.220533	1.35491	0.191958	0.272321	1.02659	0.202845	1.48532	0.286763	0.955281	0.131403	0.86239	0.0847991
5021F Glom 1 4	1	5021F	1	Low Al	54.196	0.157197	1.59662	6.50299	0.184015	17.2331	19.959	0.18073	0.175607	82.5217	88.5384	185.389	1201.51	48.4463	136.687	31.8577	3.26296	22.7711	7.22899	3.08454	0.326779	1.14335	0.236354	1.49522	0.585425	0.21925	1.34883	0.210745	1.41305	0.294428	0.773571	0.10454	0.702286	0.110253
5021F Glom 1 5	1	5021F	1	Low Al	54.6888	0.17869	1.71301	6.44001	0.178251	16.7459	19.8344	0.163928	0.14338	82.2468	87.2098	195	981.01	48.7379	125.486	30.9119	3.51875	21.3277	7.62042	3.69665	0.221499	1.02861	0.24773	1.94402	1.0724	0.222786	1.11042	0.243996	1.42053	0.37422	0.845288	0.122235	0.748414	0.122788
5021F Glom 1 6	1	5021F	1	Hi Al	53.3643	0.24305	2.3572	6.29511	0.164715	16.4969	20.9602	0.187575	0.358838	82.36	104.609	214.639	2455.18	44.335	136.215	31.3347	4.32789	24.0777	9.78646	5.58996	0.318706	1.49359	0.415033	1.52689	0.845564	0.328449	1.86652	0.256876	1.88257	0.44636	0.991495	0.154788	0.939792	0.0864058
5021GB Glom 1 Inner 1	1	5021GB	1	Hi Al	54.3307	0.183691	2.07821	5.45946	0.148786	16.8525	20.7374	0.225213	0.305218	84.6145	97.9771	203.261	2088.31	41.025	123.966	23.1134	2.06754	24.7007	7.60235	4.78476	0.41342	1.59193	0.357957	1.32412	0.685323	0.21244	1.22397	0.194567	1.25847	0.342588	0.767168	0.120564	0.699297	0.123424
5021GB Glom 1 Outer 1	1	5021GB	1	Low Al	54.7338	0.153037	1.80929	6.57076	0.183306	16.6813	19.7074	0.169856	0.149693	81.8942	87.3674	190.267	1024.2	46.9071	125.937	29.3764	2.60591	22.4825	7.99881	3.00435	0.22879	1.39391	0.341317	1.41232	0.56713	0.294049	0.973166	0.212738	1.45454	0.306117	0.872929	0.0804252	0.91619	0.119297
5021GB Glom 1 Outer 2	1	5021GB	1	Low Al	54.6833	0.14517	1.61728	6.20576	0.178821	16.8176	20.1207	0.164706	0.192034	82.8422	88.5323	175.906	1313.9	47.589	150.545	31.3281	3.14695	18.9171	7.40135	3.9494	0.239423	0.9828	0.308841	1.16993	0.455501	0.172806	1.10345	0.23946	1.63923	0.358394	0.732781	0.126238	0.650427	0.0883431
5021GB Random 1	1	5021GB	n/a	Low Al	55.6639	0.160205	1.59801	6.55044	0.185675	17.3404	18.3057	0.172898	0.182691	82.5064	78.4404	178.168	1249.98	49.6396	147.487	32.4195	3.41168	18.374	6.92074	3.18162	0.32691	0.999418	0.14332	1.76458	0.189155	0.233613	1.15303	0.159772	1.22491	0.330999	0.803991	0.113831	0.707844	0.0750242
Average of 3 Analyses, NMNH diopside 117733					55.5306	0.020262	0.229778	0.239101	0.0321534	18.3933	25.3766	0.16455			0.893032	11.0209	BDL	0.573953	1.77848	51.2996	1.48425	170.5	0.532225	17.0166	0.515434	1.25716	0.170143	0.774985	0.217407	0.021546	0.151019	0.0187169	0.104622	0.0224305	0.0440166	BDL	0.0858878	0.019274
NMNH diopside 117733, accepted value					55.81		0.11	0.25	0.04	17.79	25.28	0.25
Detection Limit	1				1.6	0.0011	0.0066	0.022	0.00033	0.0033	0.11	0.011			1.1	0.33	4.4	0.22	2.2	2.2	0.44	0.22	0.088	0.099	0.033	0.022	0.11	0.22	0.033	0.077	0.011	0.055	0.011	0.033	0.011	0.044	0.022	0.055

## Sheet: Table B5 - Orthopyroxene
Sample	Analysis Day	Sample No	Glomerocryst No.	Group	SiO2(Wt%)	TiO2(Wt%)	Al2O3(Wt%)	FeO(Wt%)	MnO(Wt%)	MgO (Wt%)	CaO(Wt%)	Na2O (Wt%)	Cr2O3(Wt%)	Mg#	Sc(ppm)	V(ppm)	Cr(ppm)	Co(ppm)	Ni(ppm)	Zn(ppm)	Ga(ppm)	Y(ppm)	Zr(ppm)	La(ppm)	Ce(ppm)	Sm(ppm)	Gd(ppm)	Dy(ppm)	Ho(ppm)	Er(ppm)	Tm(ppm)	Yb(ppm)	Lu(ppm)
Technique					LA-ICP-MS	LA-ICP-MS	LA-ICP-MS	LA-ICP-MS	LA-ICP-MS	LA-ICP-MS	LA-ICP-MS	LA-ICP-MS	recalculated from Cr		LA-ICP-MS	LA-ICP-MS	LA-ICP-MS	LA-ICP-MS	LA-ICP-MS	LA-ICP-MS	LA-ICP-MS	LA-ICP-MS	LA-ICP-MS	LA-ICP-MS	LA-ICP-MS	LA-ICP-MS	LA-ICP-MS	LA-ICP-MS	LA-ICP-MS	LA-ICP-MS	LA-ICP-MS	LA-ICP-MS	LA-ICP-MS
5021A Glom1 4	1	5021A	1	Hi Al	56.6562	0.113403	1.79189	11.3262	0.237621	28.4204	1.41973	0.0153056	0.243015	81.7204	39.9777	105.276	1662.72	92.3804	246.444	95.1961	2.83679	0.872143	0.722977	BDL	BDL	BDL	0.0934131	0.245372	0.0532451	0.207816	BDL	0.268624	BDL
5021A Glom1 7	1	5021A	1	Hi Al	55.7117	0.139084	2.30155	12.6391	0.260372	27.5058	1.47413	0.0188532	0.152317	79.4968	56.0691	152.68	1042.16	95.4903	193.963	113.227	4.15004	1.88288	1.63863	0.0944534	0.314202	0.212196	0.0144248	0.45269	0.104201	0.348291	0.066149	0.604012	0.0726637
5021A Glom 2 3	1	5021A	2	Hi Al	55.0546	0.131296	2.82294	12.0315	0.232164	28.3156	1.42206	0.018865	0.337328	80.7434	38.1717	140.276	2308.01	98.4485	393.393	99.8348	5.198	1.52313	1.2121	0.0515584	0.0964782	0.0671255	0.0810032	0.353208	0.0534632	0.286144	BDL	0.349083	0.0908843
5021A Glom 2 4	1	5021A	2	Hi Al	55.4456	0.14711	2.60813	12.1514	0.244847	27.6222	1.75099	0.0219542	0.167672	80.1979	47.4021	160.197	1147.21	92.2323	297.912	88.5934	4.28704	2.30927	1.55162	0.0696742	0.0786076	0.114322	0.425519	0.448558	0.0922632	0.307665	0.0468484	0.533589	0.074597
5021A Glom 2 5	1	5021A	2	Hi Al	55.6215	0.119391	2.30554	12.0505	0.240241	28.3469	1.29883	0.0180225	0.179101	80.736	40.4296	140.556	1225.42	93.361	275.167	96.9163	3.5004	1.69891	1.29538	BDL	BDL	BDL	0.15917	0.214123	0.0438451	0.222135	BDL	0.426081	0.0594375
5021A Glom 3 2	1	5021A	3	Low Al	56.9492	0.0843488	0.828071	12.3317	0.261666	27.7842	1.71634	0.0165384	0.100568	80.0565	24.3117	66.5607	688.086	98.3771	208.791	105.713	1.74058	0.944092	0.187768	BDL	BDL	0.0446543	0.0943221	0.0352427	BDL	0.129528	BDL	0.192784	BDL
5021A Glom 3 9	1	5021A	3	Low Al	56.8005	0.0912061	1.00594	12.1806	0.252395	28.1907	1.40723	0.0193354	0.0812804	80.4817	26.2491	69.4409	556.123	96.3626	207.192	101.487	1.56967	0.984698	0.48	0.0711125	0.071918	BDL	BDL	0.107721	0.0557928	0.181867	BDL	0.219706	BDL
5021A Glom 3 10	1	5021A	3	Hi Al	56.6357	0.111253	1.83388	11.9377	0.250122	28.0054	1.24824	0.0146694	0.17029	80.6938	35.9628	109.582	1165.13	93.793	222.078	95.668	2.63003	1.52905	0.673689	0.102031	0.0724332	0.0785454	BDL	0.125815	0.0477029	0.170968	0.045925	0.216185	0.0728221
5021A Glom 3 11	1	5021A	3	Low Al	56.4169	0.0712308	0.826775	10.8393	0.240759	30.0472	1.55067	0.0336863	0.124842	83.1616	18.0534	63.6855	854.173	90.7339	233.847	96.6016	1.90043	0.561058	0.250928	BDL	BDL	BDL	BDL	0.053861	BDL	0.127664	BDL	0.0924646	BDL
5021A Glom 4 1	1	5021A	4	Hi Al	57.079	0.109156	1.5498	11.6686	0.247249	27.5135	1.76629	0.0156362	0.141601	80.7727	44.9967	108.112	968.838	92.61	252.068	97.506	2.98484	2.12761	0.939016	0.0799637	0.0986269	BDL	BDL	0.259669	0.0806691	0.180511	0.0567175	0.414832	BDL
5021A Glom 4 2	1	5021A	4	Hi Al	55.5216	0.106172	1.81417	11.9928	0.249693	29.1076	1.23817	0.0314052	0.165315	81.2178	37.1198	119.551	1131.09	95.2455	225.939	102.866	3.71559	1.1278	0.880283	0.0723502	0.140327	BDL	BDL	0.254582	0.0395754	0.207083	BDL	0.272049	0.0699944
5021A Glom 4 3	1	5021A	4	Hi Al	56.7878	0.112648	1.82918	12.0197	0.247978	27.6898	1.29375	0.0165733	0.152169	80.4089	37.0373	119.303	1041.14	94.983	223.918	101.051	4.20904	1.23661	0.521109	BDL	BDL	0.134408	0.0753762	0.191234	0.0626152	0.191967	BDL	0.312423	BDL
5021A Glom 4 4	1	5021A	4	Hi Al	55.7952	0.118263	2.02003	12.52	0.251209	27.7537	1.5109	0.0148791	0.182054	79.7957	40.2002	118.718	1245.62	97.9308	227.407	105.725	3.885	1.65528	0.803831	BDL	0.0418708	0.0816005	0.0906161	0.116588	0.0459559	0.177489	BDL	0.439318	0.0696713
5021A Glom 4 6	1	5021A	4	Hi Al	55.9536	0.100997	1.99024	12.6554	0.248299	27.7282	1.27359	0.0157877	0.101405	79.6067	40.6014	130.208	693.814	99.5424	248.92	104.473	2.54148	1.06873	0.643827	0.12994	0.104406	0.135698	0.257181	0.151643	0.0686927	0.200047	BDL	0.315302	0.0563956
5021A Glom 4 10	1	5021A	4	Low Al	56.4553	0.0832975	0.997699	12.2416	0.255161	28.7152	1.26239	0.016431	0.0809495	80.6919	24.6925	70.6262	553.859	94.3081	209.804	104.555	1.94239	0.69964	0.457624	BDL	0.0676773	0.0448883	0.0815048	0.135831	BDL	0.157413	BDL	0.223775	BDL
5021A Glom 4 11	1	5021A	4	Hi Al	56.1323	0.0934833	1.64719	11.6473	0.24047	28.884	1.20445	0.0154231	0.195901	81.5439	32.4176	102.845	1340.36	91.5907	227.092	101.872	2.59672	0.906661	0.347547	BDL	0.0340255	0.0407067	0.0955337	0.0634832	0.0400669	0.162552	BDL	0.161432	0.0556542
5021A Glom 4 12	1	5021A	4	Hi Al	55.8749	0.10294	1.84445	12.0253	0.247337	28.6664	1.24934	0.0164312	0.177318	80.942	42.0242	110.439	1213.22	95.0798	223.729	108.105	4.02867	1.32461	1.12862	0.0405859	BDL	BDL	0.0379479	0.0615056	0.0612595	0.149755	BDL	0.202397	BDL
5021A Glom 5 1	1	5021A	5	Hi Al	55.6563	0.131273	2.03998	12.4819	0.250215	28.0453	1.37252	0.0170224	0.144083	80.0125	42.6909	128.125	985.823	96.4024	201.633	103.567	3.73541	1.76653	0.520523	BDL	0.0524069	BDL	BDL	0.192968	0.0598835	0.246102	BDL	0.240061	BDL
5021A Glom 5 2	1	5021A	5	Hi Al	56.3761	0.111872	1.89404	12.4903	0.253364	27.3601	1.43408	0.0204764	0.134808	79.603	44.2514	124.821	922.359	95.0468	199.439	94.0416	4.52165	1.4817	0.801753	BDL	0.0723965	BDL	0.0925176	0.226099	0.0461985	0.294484	BDL	0.352532	0.0744657
5021A Glom 5 3	1	5021A	5	Hi Al	55.9334	0.112735	1.80522	11.287	0.245989	29.2236	1.2181	0.121765	0.216548	82.1839	36.1949	104.805	1481.63	90.792	243.346	81.8333	3.58445	1.20645	1.90264	0.0648779	0.0491561	BDL	0.127304	0.150769	0.0565984	0.216438	BDL	0.23232	BDL
5021A Glom 5 4	1	5021A	5	Low Al	56.373	0.0817543	0.920393	12.1384	0.258222	28.8001	1.39657	0.0168815	0.077753	80.8692	24.1698	70.8871	531.988	94.5432	212.102	101.381	1.33913	0.898135	0.302461	BDL	BDL	BDL	0.113171	0.122508	0.0351797	0.0994394	BDL	0.178817	BDL
5021A Glom 5 6	1	5021A	5	Hi Al	55.3461	0.114731	1.91195	12.5544	0.249451	28.5191	1.31576	0.0128053	0.141356	80.1872	41.3423	129.895	967.165	93.6321	198.469	101.265	3.43112	1.21905	0.643395	BDL	BDL	BDL	0.105623	0.208905	BDL	0.192653	BDL	0.321158	BDL
5021A Glom 5 7	1	5021A	5	Low Al	56.5788	0.0789031	0.971274	12.1369	0.261117	28.6844	1.27054	0.0153376	0.0828741	80.8088	22.5947	73.4209	567.027	94.4706	207.979	110.478	1.51504	0.686237	0.402371	BDL	0.0523941	0.0356991	0.0403118	0.0866385	BDL	0.105495	BDL	0.203197	BDL
5021C Glom 2 1	1	5021C	2	Hi Al	56.1248	0.100343	1.80391	12.1905	0.245459	28.2217	1.3757	0.0148756	0.189178	80.4862	36.8178	112.143	1294.36	91.6055	229.059	110.907	3.71349	1.25825	0.538978	0.095186	0.0919737	0.124797	BDL	0.278542	0.0734032	0.225504	BDL	0.267548	BDL
5021C Glom 2 2	1	5021C	2	Low Al	57.3029	0.0764946	1.00623	11.594	0.247415	28.3769	1.33524	0.0198495	0.101096	81.3455	22.5104	68.6848	691.701	93.8764	240.132	97.3835	1.38992	0.9726	0.337378	0.0572928	0.0418113	0.0770541	0.0940961	0.0697688	0.0466508	0.162184	BDL	0.243536	BDL
5021C Glom 2 3	1	5021C	2	Hi Al	55.6564	0.117801	1.4981	12.349	0.260469	26.1684	3.87669	0.0465056	0.0543227	79.0594	50.4785	132.499	371.677	91.9678	178.325	113.276	3.4605	2.80993	2.18667	0.312924	0.539501	0.222957	0.190369	0.491388	0.161113	0.398534	0.0986206	0.399042	0.0887617
5021C Glom 2 6	1	5021C	2	Hi Al	55.0238	0.12733	2.16996	12.6681	0.253334	28.3953	1.38178	0.0213662	0.154184	79.974	41.7208	128.251	1054.93	96.5753	208.28	92.8144	3.41788	1.6786	0.710483	BDL	0.0609158	0.0427675	BDL	0.227116	0.0976248	0.19926	BDL	0.337684	BDL
5021C Glom 3 1	1	5021C	3	Low Al	56.7552	0.0805572	0.993208	12.1566	0.256188	28.234	1.5396	0.0266006	0.081916	80.5368	24.2	77.644	560.471	96.4197	202.582	93.9895	1.5405	1.27993	0.45523	BDL	0.139887	BDL	0.0659631	0.123921	0.0676546	0.122705	BDL	0.204066	BDL
5021C Glom 3 3	1	5021C	3	Low Al	56.2421	0.0800375	0.976652	12.3309	0.252794	28.7614	1.35206	0.0157501	0.0899438	80.6036	24.6782	70.9733	615.398	96.4921	207.04	101.88	1.68619	0.979771	0.324746	BDL	BDL	BDL	0.0640552	0.0764809	BDL	0.128617	BDL	0.185379	BDL
5021C Glom 3 15	1	5021C	3	Hi Al	55.871	0.116044	1.5952	12.0608	0.252298	28.6208	1.4403	0.0206727	0.156028	80.8719	38.9459	104.401	1067.55	95.4476	203.523	116.363	1.92151	1.13666	0.50647	0.0873362	0.211086	0.164759	0.121645	0.109725	0.0611035	0.233673	0.0447192	0.290819	BDL
5021C Opx Solocryst 1	1	5021C	n/a	Hi Al	55.6159	0.142643	2.31876	12.7945	0.256207	27.3929	1.46308	0.0177652	0.0802179	79.2293	53.3828	140.182	548.853	96.4884	195.242	102.422	4.00473	1.96948	1.23093	BDL	BDL	0.108619	0.170703	0.23933	0.0920253	0.259667	0.0615378	0.362264	0.0904679
5021C Opx Solocryst 2	1	5021C	n/a	Hi Al	56.4251	0.100864	1.78122	11.3024	0.239705	28.599	1.54166	0.0142433	0.229066	81.8452	35.6236	112.11	1567.28	90.3319	222.813	84.5196	2.76496	1.22058	0.633323	BDL	BDL	0.0369645	0.064105	0.172569	0.0578078	0.190386	BDL	0.265782	BDL
5021C Opx Solocryst 3	1	5021C	n/a	Low Al	56.9186	0.0704363	1.00066	12.1205	0.255287	28.1102	1.527	0.0177931	0.0841713	80.5145	25.3301	73.4348	575.902	96.0561	211.081	102.331	2.20049	0.819911	0.50958	BDL	BDL	0.0760241	0.0285037	0.110299	0.0356714	0.105629	BDL	0.270583	BDL
5021C Glom 4 1	1	5021C	4	Low Al	56.7929	0.0730881	0.80367	12.1988	0.267201	28.5224	1.31914	0.0184215	0.0840615	80.6416	23.7787	66.5272	575.152	96.695	209.88	100.287	1.95393	0.794562	0.440509	BDL	0.0739744	BDL	BDL	0.139426	0.0404115	0.105823	BDL	0.0895858	BDL
5021C Glom 4 2	1	5021C	4	Low Al	56.4034	0.079153	0.980589	11.7966	0.258446	29.1817	1.28069	0.0170583	0.0719068	81.5066	24.4081	64.8283	491.989	94.4108	216.051	98.0127	1.19385	0.7714	0.397206	BDL	0.0345906	BDL	0.0527963	0.0931038	0.0365194	0.132374	BDL	0.114035	BDL
5021C Glom 4 3	1	5021C	4	Hi Al	56.7078	0.117326	1.47491	11.9241	0.253233	27.8417	1.64701	0.0178132	0.135314	80.62	40.0737	98.5827	925.82	93.8013	214.891	96.2141	2.27738	1.4373	0.801424	0.0850821	0.0885867	0.112335	BDL	0.223417	0.0682626	0.189857	BDL	0.313156	BDL
5021C Glom 4 6	1	5021C	4	Hi Al	56.4882	0.10233	1.51081	11.0997	0.233809	29.2201	1.30978	0.0166496	0.225605	82.4258	30.6652	98.3342	1543.6	87.063	243.162	81.098	1.78429	0.655946	0.406427	0.0352157	0.0452918	BDL	BDL	0.137951	0.0400543	0.141388	BDL	0.192651	BDL
5021C Glom 4 10	1	5021C	4	Low Al	57.0451	0.0724809	0.861393	11.6161	0.251469	28.7987	1.33265	0.0154032	0.0857992	81.5398	24.7971	64.8787	587.041	91.8597	211.285	91.0349	2.10466	0.724477	0.264263	BDL	BDL	BDL	0.0666151	0.109846	BDL	0.151903	BDL	0.117592	BDL
5021F Corona 1 3	1	5021F	Corona 1	Hi Al	56.3595	0.127506	1.83223	12.3133	0.246116	27.7447	1.50176	0.0131188	0.115402	80.0575	41.5355	104.061	789.584	92.5264	213.185	91.2101	3.36562	1.6813	0.93248	BDL	0.029021	0.101321	0.18234	0.110155	0.0471859	0.0814816	BDL	0.387573	0.0717265
5021F Corona 1 4	1	5021F	Corona 1	Low Al	57.1788	0.0753651	0.98779	11.9659	0.248335	28.0765	1.45308	0.0124499	0.0965832	80.6964	25.6205	66.0545	660.825	93.2224	222.007	101.113	1.89889	0.655766	0.391669	BDL	BDL	BDL	0.139604	0.0661025	0.032916	0.121369	BDL	0.25643	BDL
5021F Corona 1 Rim 1	1	5021F	Corona 1	Hi Al	55.8271	0.103079	1.91908	12.2364	0.253446	28.2859	1.3637	0.0134527	0.20073	80.4628	43.0372	116.319	1373.4	98.0559	240.092	94.9219	4.63148	1.57489	0.38124	BDL	0.026911	BDL	0.185429	0.228356	0.0525372	0.214006	BDL	0.289347	BDL
5021F Corona 1 Rim 2	1	5021F	Corona 1	Hi Al	56.2659	0.10646	1.95354	12.3564	0.254747	27.8383	1.21678	0.0211652	0.14261	80.0555	43.5913	125.442	975.745	96.0002	214.931	101.391	3.05553	1.85992	0.792271	BDL	0.0425156	0.0414222	0.113224	0.179977	0.061236	0.247299	BDL	0.367102	0.0909936
5021F Corona 2 Rim 1	1	5021F	Corona 2	Hi Al	55.9896	0.120745	2.08728	12.2238	0.251568	27.919	1.39995	0.0295451	0.116853	80.2732	45.5159	130.421	799.514	99.8219	250.99	98.5442	3.21651	1.37705	1.072	0.0480337	0.0764603	0.0913666	0.208895	0.179925	0.0594172	0.300663	0.0495219	0.288478	0.0968141
5021F Corona 2 Rim 2	1	5021F	Corona 2	Low Al	56.7732	0.0919274	1.19666	12.0342	0.249166	28.1222	1.52373	0.012864	0.125216	80.633	27.864	81.5156	856.731	95.9366	231.711	100.1	2.90754	1.0789	0.427914	BDL	BDL	0.0481228	0.0120494	0.176212	0.0362446	0.159216	BDL	0.223479	BDL
5021F Corona 2 Rim 3	1	5021F	Corona 2	Hi Al	56.1893	0.123559	2.61485	12.2523	0.244686	27.4047	1.23674	0.0135169	0.0646514	79.9398	47.1679	151.102	442.347	97.4965	343.464	96.204	4.60391	2.02882	1.29065	BDL	0.0363609	0.143127	0.2177	0.280286	0.10235	0.302368	0.0459287	0.539901	0.0727832
5021F Corona 2 Rim 4	1	5021F	Corona 2	Hi Al	55.9528	0.142113	2.47898	12.1238	0.249577	27.6148	1.40611	0.0176209	0.12514	80.2297	48.875	154.061	856.212	97.3312	287.138	99.8847	3.2247	2.49246	1.75461	BDL	0.0601845	0.183846	0.0392546	0.237564	0.0745175	0.289041	0.0579977	0.419857	0.0916153
5021F Corona 3 Rim 1	1	5021F	Corona 3	Hi Al	57.0083	0.14569	2.16166	12.1544	0.252509	26.6828	1.51419	0.0207968	0.103476	79.6386	46.3991	135.062	707.984	94.2881	258.97	91.9425	3.73526	2.04535	0.939278	BDL	0.0343156	0.0431653	0.151609	0.269802	0.0621107	0.30738	0.0600795	0.572526	0.0945117
5021F Corona 3 Rim 2	1	5021F	Corona 3	Hi Al	56.4618	0.117556	1.89931	11.8791	0.243748	27.8633	1.4711	0.0201149	0.156378	80.6911	38.2592	112.953	1069.94	95.2173	233.632	96.5884	3.06023	1.36301	0.767472	BDL	BDL	0.121301	0.184936	0.173044	0.0493125	0.157973	BDL	0.315226	0.0623293
5021F Corona 3 Rim 3	1	5021F	Corona 3	Hi Al	55.404	0.134656	2.64262	12.4648	0.2553	27.6282	1.42647	0.0210257	0.171145	79.7938	55.8481	167.559	1170.98	94.5489	258.832	89.1629	4.75051	2.23138	1.50089	BDL	0.0412621	0.315579	0.056836	0.218297	0.0878876	0.34604	0.054135	0.342811	0.0724621
5021F Corona 3 Rim 4	1	5021F	Corona 3	Hi Al	55.8765	0.122042	2.05712	12.5306	0.251525	27.8061	1.33569	0.0153987	0.144045	79.8125	42.9734	123.359	985.56	97.3617	248.578	100.114	3.3776	1.55824	0.753012	BDL	BDL	0.111547	0.0520102	0.293817	BDL	0.186087	BDL	0.373145	0.0551219
5021F Corona 3 Rim 5	1	5021F	Corona 3	Hi Al	55.8034	0.105675	1.77303	12.3601	0.250785	28.1951	1.42146	0.0209174	0.16361	80.2534	40.3501	110.478	1119.42	95.2376	238.882	105.801	2.98652	1.52247	0.757374	BDL	0.0489173	0.0683427	0.0457493	0.187858	0.0594516	0.20475	BDL	0.288195	BDL
5021F Corona 3 Rim 6	1	5021F	Corona 3	Hi Al	56.2617	0.115397	1.82348	11.871	0.250648	28.1862	1.46528	0.0168042	0.183782	80.8805	39.4081	108.162	1257.44	97.3407	238.516	107.056	4.17086	1.43226	0.691194	BDL	BDL	BDL	0.129629	0.168822	0.0492539	0.244612	BDL	0.372556	0.0666503
5021F Corona 4 Rim 1	1	5021F	Corona 4	Hi Al	57.1168	0.108881	1.66976	12.0262	0.24213	27.5001	1.34268	0.015213	0.15199	80.2918	38.0118	102.294	1039.92	95.2913	220.537	95.032	3.05884	1.49532	0.447009	BDL	BDL	BDL	0.0657729	0.241326	0.0602389	0.209074	BDL	0.268764	0.0708818
5021F Corona 4 Rim 2	1	5021F	Corona 4	Low Al	57.7552	0.0671821	0.825388	11.5486	0.248839	28.0386	1.55908	0.0182022	0.0931009	81.2228	23.0683	61.3488	636.999	97.1353	234.078	98.0736	1.42781	0.623254	0.211917	BDL	BDL	0.0368566	BDL	0.0855082	BDL	0.143705	BDL	0.076759	BDL
5021F Corona 4 Rim 3	1	5021F	Corona 4	Low Al	57.4794	0.0718265	0.903157	11.5041	0.250543	28.0922	1.64364	0.0139419	0.0982264	81.3106	24.7736	65.35	672.068	95.0801	235.461	94.3722	1.96397	0.807554	0.230229	BDL	BDL	BDL	BDL	0.0640364	BDL	0.09013	BDL	0.112423	BDL
5021F Corona 4 Rim 4	1	5021F	Corona 4	Hi Al	56.2499	0.115449	2.0937	12.1644	0.241332	27.6661	1.41701	0.0155565	0.17273	80.2061	42.593	120.375	1181.82	95.4852	238.808	87.5169	3.38324	1.61404	0.79501	BDL	0.0615998	BDL	0.0870503	0.203051	0.0425542	0.201246	0.0459236	0.31281	0.0562599
5021F Corona 4 Rim 5	1	5021F	Corona 4	Hi Al	56.5487	0.118837	1.77569	12.2049	0.248169	27.7094	1.35404	0.0129999	0.170688	80.1781	36.0833	115.16	1167.86	99.0809	226.233	103.374	2.90129	1.51379	0.881608	0.0373224	0.0180956	BDL	0.116406	0.234476	0.0704866	0.148869	BDL	0.336666	BDL
5021F Corona 4 Rim 6	1	5021F	Corona 4	Low Al	57.441	0.0804071	1.02948	11.8959	0.244182	27.8201	1.4603	0.0166284	0.0992692	80.645	24.2007	70.0966	679.202	95.2063	235.465	102.31	2.32988	0.763107	0.404484	0.0404605	0.518397	BDL	0.093086	0.137863	BDL	0.0881244	BDL	0.024047	BDL
5021F Corona 4 Rim 7	1	5021F	Corona 4	Hi Al	55.2448	0.131152	3.10684	12.6937	0.251694	27.0431	1.61328	0.0202698	0.098208	79.1479	51.8056	187.388	671.942	98.6698	291.659	91.2634	5.559	2.36405	1.63881	BDL	0.0406201	0.0867894	0.232662	0.230587	0.085642	0.36375	BDL	0.432444	0.0772933
5021F Corona 4 Rim 8	1	5021F	Corona 4	Hi Al	55.7801	0.126825	2.94222	12.5315	0.245728	26.6017	1.60369	0.0238505	0.13306	79.0885	51.0952	175.142	910.399	94.8534	265.789	99.4653	5.10816	1.92011	1.44073	BDL	BDL	BDL	0.185312	0.321423	0.055744	0.33573	0.04542	0.552035	0.0664753
5021F Corona 4 Rim 9	1	5021F	Corona 4	Hi Al	56.8599	0.106008	1.79765	12.0931	0.240477	27.4968	1.35629	0.0146586	0.105707	80.202	32.7388	110.445	723.247	97.0273	241.943	96.1543	3.3443	1.23821	0.780987	BDL	0.0567052	0.173328	0.121313	0.285016	0.0389352	0.224547	BDL	0.32107	BDL
5021F Glom 1 7	1	5021F	1	Low Al	56.8603	0.0781837	0.810278	11.4236	0.251715	28.9113	1.69917	0.0119287	0.122137	81.848	24.3848	61.9256	835.668	96.4172	230.814	95.5472	0.576224	0.639331	0.429655	BDL	BDL	BDL	0.111171	0.114841	0.0381088	0.132231	BDL	0.0876492	BDL
5021F Glom 1 8	1	5021F	1	Low Al	56.7586	0.0905886	1.00323	12.151	0.255422	28.2103	1.56255	0.0138687	0.0793314	80.5309	29.1785	71.5712	542.788	99.2181	202.767	101.72	2.2142	0.97559	0.836501	BDL	BDL	BDL	0.024103	0.179313	0.0545402	0.149863	BDL	0.159674	BDL
5021GB Corona 1 Rim 1	1	5021GB	Corona 1	Low Al	57.7162	0.0772605	0.866003	11.4932	0.249194	28.1364	1.39938	0.0136389	0.104173	81.3489	25.6279	60.1577	712.755	95.6733	225.043	95.6492	1.68073	1.0006	0.370811	0.0364322	BDL	0.0985994	0.102823	0.145377	BDL	0.0873352	BDL	0.180092	BDL
5021GB Corona 1 Rim 2	1	5021GB	Corona 1	Hi Al	56.1449	0.127618	1.91076	12.5538	0.254903	27.3858	1.58354	0.0163825	0.121239	79.5359	46.2911	118.49	829.523	100.269	213.095	93.6959	3.79659	1.14083	0.820556	BDL	BDL	BDL	0.0623069	0.282635	0.0540755	0.239285	BDL	0.395645	BDL
5021GB Corona 1 Rim 3	1	5021GB	Corona 1	Low Al	56.7776	0.0760637	1.00628	11.6309	0.254974	28.5806	1.68726	0.013551	0.0980981	81.4059	27.589	70.9223	671.19	96.0033	221.933	98.6469	1.38282	0.777849	0.240408	BDL	BDL	0.0916944	0.0322995	0.0865341	BDL	0.155047	BDL	0.191306	BDL
5021GB Corona 1 Rim 5	1	5021GB	Corona 1	Hi Al	56.763	0.10612	1.98538	11.0095	0.230628	28.0393	1.84557	0.0228229	0.365536	81.9413	43.338	122.674	2501.01	89.8509	272.047	84.3124	3.89188	1.62119	0.946067	BDL	BDL	0.0984743	0.155147	0.297736	0.0642379	0.242044	0.063679	0.309125	BDL
5021GB Corona 1 Rim 6	1	5021GB	Corona 1	Hi Al	56.8156	0.0952562	1.58196	11.2671	0.242777	28.5662	1.37904	0.0181697	0.193842	81.8745	40.623	96.0877	1326.27	93.1073	259.807	94.5234	3.42474	1.24387	0.631627	BDL	BDL	BDL	0.0901839	0.145065	0.0421128	0.183816	BDL	0.305375	BDL
5021GB Corona 1 Rim 7	1	5021GB	Corona 1	Hi Al	56.9902	0.101718	1.89314	12.1069	0.245704	27.2213	1.4131	0.0179587	0.130616	80.0234	40.171	114.058	893.675	96.4113	210.839	99.7853	3.53342	1.32361	1.03577	BDL	BDL	BDL	0.0373512	0.207205	BDL	0.153918	BDL	0.342839	BDL
5021GB Corona 1 Rim 8	1	5021GB	Corona 1	Hi Al	56.6947	0.0908647	1.67538	11.2633	0.23764	28.2444	1.81565	0.0195695	0.163713	81.7108	39.6579	112.972	1120.13	89.4938	269.359	88.2509	3.04442	1.40002	0.637005	BDL	0.0254136	0.0456031	BDL	0.215993	BDL	0.203715	BDL	0.189776	BDL
5021GB Corona 1 Rim 9	1	5021GB	Corona 1	Low Al	58.2176	0.0845934	0.864762	11.6592	0.252382	27.4548	1.4649	0.0133022	0.0858453	80.7521	23.0687	63.1239	587.356	96.7125	214.513	89.1982	1.57725	0.826833	0.290365	BDL	BDL	0.0528	BDL	0.0896815	BDL	0.0923256	BDL	0.13152	BDL
5021GB Corona 1 Rim 10	1	5021GB	Corona 1	Hi Al	57.4794	0.110895	1.7082	11.59	0.240364	27.6255	1.23379	0.0165991	0.178617	80.9402	36.9134	97.4379	1222.1	92.4871	237.286	100.812	4.04381	1.47295	0.510315	BDL	BDL	BDL	0.0317541	0.131829	0.0386034	0.119262	BDL	0.357746	0.0556488
5021GB Corona 1 Rim 12	1	5021GB	Corona 1	Hi Al	57.4977	0.0829051	1.48018	10.8778	0.234787	28.5552	1.21018	0.0148913	0.241914	82.3849	34.6378	88.1894	1655.18	88.6072	251.92	77.947	2.18075	0.810178	0.292054	BDL	BDL	0.0707932	BDL	0.142872	0.0525765	0.097231	BDL	0.193158	BDL
5021GB Corona 2 Rim 2	1	5021GB	Corona 2	Low Al	58.3552	0.0837048	1.10104	11.2715	0.250748	27.405	1.43327	0.045197	0.0947454	81.2446	22.7752	64.6172	648.251	92.3014	234.913	94.2543	1.79108	0.96152	0.707441	BDL	0.0652703	0.131635	0.232759	0.140488	0.0408221	0.182336	BDL	0.127363	BDL
5021GB Random 2	1	5021GB	n/a	Hi Al	56.84	0.164363	2.74141	14.0653	0.263072	24.6835	1.30656	0.0188207	0.067563	75.7672	56.7849	184.928	462.268	101.929	175.32	105.025	4.53397	2.18436	1.41652	BDL	BDL	BDL	0.0490782	0.217974	0.0515474	0.203246	0.0438099	0.452696	0.104262
Detection Limit	1				1.6	0.0011	0.0066	0.022	0.00033	0.0033	0.11	0.011			1.1	0.33	4.4	0.22	2.2	2.2	0.44	0.088	0.099	0.033	0.022	0.033	0.011	0.011	0.033	0.011	0.044	0.022	0.055

## Sheet: Table B6- Standard Information
Element	SiO2(Wt%)	TiO2(Wt%)	Al2O3(Wt%)	FeOt(Wt%)	MnO(Wt%)	MgO (Wt%)	CaO(Wt%)	Na2O (Wt%)	K2O(Wt%)	P2O5(Wt%)	Sc(ppm)	V(ppm)	Cr(ppm)	Co(ppm)	Ni(ppm)	Cu(ppm)	Zn(ppm)	Ga(ppm)	Rb(ppm)	Sr(ppm)	Y(ppm)	Zr(ppm)	Nb(ppm)	Cs(ppm)	Ba(ppm)	La(ppm)	Ce(ppm)	Pr(ppm)	Nd(ppm)	Sm(ppm)	Eu(ppm)	Gd(ppm)	Tb(ppm)	Dy(ppm)	Ho(ppm)	Er(ppm)	Tm(ppm)	Yb(ppm)	Lu(ppm)	Hf(ppm)	Ta(ppm)	Pb(ppm)	Th(ppm)	U(ppm)
Technique	LA-ICP-MS	LA-ICP-MS	LA-ICP-MS	LA-ICP-MS	LA-ICP-MS	LA-ICP-MS	LA-ICP-MS	LA-ICP-MS	LA-ICP-MS	LA-ICP-MS	LA-ICP-MS	LA-ICP-MS	LA-ICP-MS	LA-ICP-MS	LA-ICP-MS	LA-ICP-MS	LA-ICP-MS	LA-ICP-MS	LA-ICP-MS	LA-ICP-MS	LA-ICP-MS	LA-ICP-MS	LA-ICP-MS	LA-ICP-MS	LA-ICP-MS	LA-ICP-MS	LA-ICP-MS	LA-ICP-MS	LA-ICP-MS	LA-ICP-MS	LA-ICP-MS	LA-ICP-MS	LA-ICP-MS	LA-ICP-MS	LA-ICP-MS	LA-ICP-MS	LA-ICP-MS	LA-ICP-MS	LA-ICP-MS	LA-ICP-MS	LA-ICP-MS	LA-ICP-MS	LA-ICP-MS	LA-ICP-MS
Measurements of day-long quality assurance standards (Average of 5 drift-corrected analyses)
BHVO-1, GeoReM preferred value*	49.79	2.742	13.69	11.076	0.1689	7.213	11.43	2.313	0.5256	0.2773	31.42	313.8	287.6	44.9	120	**	**	21.32	9.52	399.2	26.23	174.6	18.53	0.1032	134.4	15.44	38.08	5.419	24.78	6.165	2.053	6.285	0.9455	5.272	0.9839	2.501	0.3289	1.987	0.2775	4.44	1.174	2.037	1.225	0.4182
BHVO-1 Day 1	49.5263	2.7944	14.0237	10.8841	0.168599	7.14014	11.5376	2.18644	0.511627	0.254248	32.4186	314.118	288.927	44.8011	121.107	**	**	21.4322	9.52688	414.336	27.5956	173.264	18.6983	0.0957403	138.062	16.5941	39.4333	5.59824	26.2164	6.76458	2.25051	6.68243	1.01099	5.8034	1.08141	2.74491	0.3477	2.1553	0.298564	4.70679	1.27239	2.14624	1.31435	0.470991
BHVO-1 Day 2	49.5438	2.76375	13.7816	11.1143	0.170235	7.23167	11.4627	2.2421	0.506211	0.259297	32.3198	311.108	284.881	45.2249	120.988			21.4468	9.3833	400.761	27.071	175.615	19.1904	0.106179	138.843	16.7655	39.1767	5.51926	25.7886	6.25015	2.1642	6.82636	0.97783	5.51334	1.01527	2.5575	0.351564	2.12333	0.294175	4.62076	1.21997	2.0806	1.36993	0.461109
BHVO-1 Day 3 (whole rock)											30.3417	321.541	300.359	44.5499	119.646			21.8995	9.26267	397.517	25.2907	168.397	18.5419	0.097691	134.293	15.3143	39.4723	5.51314	24.8318	6.17696	2.07646	6.18492	0.907512	5.15815	0.947741	2.43727	0.328239	1.9779	0.280978	4.3251	1.19614	2.07746	1.23085	0.410239
JB-1a, GeoReM preferred value*	52.56	1.29	14.51	8.087	0.1419	7.81	9.314	2.738	1.407	0.261	27.81	200.3	408	38.53	139.5	**	**	18.13	38.15	443.4	22.91	140.1	27.57	1.216	495.1	37.74	65.93	7.1	26.15	5.099	1.484	4.7	0.699	4.07	0.805	2.232	0.3197	2.1	0.3147	3.47	1.738	6.44	8.97	1.615
JB-1a Day 1	52.7596	1.27778	14.4588	8.2552	0.151577	7.82731	9.14135	2.78124	1.39452	0.254126	27.0326	202.544	430.101	39.0961	145.321	**	**	19.9013	39.0661	454.748	22.8092	130.532	28.1488	1.2698	521.425	39.0872	69.0612	7.27805	27.1438	5.37908	1.58916	4.85552	0.746246	4.38669	0.855185	2.34175	0.329457	2.19378	0.304529	3.58363	1.81308	6.84598	9.53693	1.68964
JB-1a Day 2	53.5355	1.25183	13.8737	8.2574	0.149332	7.81161	8.94508	2.81561	1.39165	0.268628	25.4479	203.239	425.379	38.9777	144.255			18.7127	38.6819	426.982	20.4502	123.762	27.9261	1.2707	510.337	37.2973	66.8156	6.77131	25.0013	4.80601	1.44378	4.56043	0.662233	3.78082	0.745809	2.00357	0.302635	1.96753	0.288603	3.22365	1.64558	6.35295	9.05649	1.66125
JB-1a Day 3 (whole rock)											27.952	200.111	419.129	38.4335	142.981			19.848	38.0368	447.027	22.8808	137.718	28.1723	1.17325	502.395	38.1672	67.6288	7.29018	26.6968	5.21558	1.49554	4.86162	0.700932	4.1068	0.800328	2.23654	0.325565	2.08841	0.321747	3.56421	1.78875	6.52092	9.28232	1.58412
Day-long reproducibility (Average of 5 drift-corrected analyses, relative standard deviation in %)
BHVO-1 Day 1	0.00691086	0.0114988	0.0130056	0.0113554	0.0116705	0.00598622	0.00922103	0.00547949	0.016572	0.0719221	0.0294899	0.00689817	0.00999808	0.0167885	0.00994788	**	**	0.0141167	0.0168135	0.0124682	0.0324844	0.0274205	0.0211297	0.0881148	0.0170822	0.0271404	0.0234265	0.0331321	0.0347748	0.0464263	0.0561847	0.0632172	0.0368649	0.0472254	0.0524452	0.0603599	0.042771	0.04471	0.0640727	0.0509407	0.0569118	0.0353542	0.0418892	0.0269838
JB-1a Day 1	0.00447807	0.0116237	0.00899012	0.0119948	0.0123646	0.00348677	0.0141391	0.0123878	0.0105214	0.0457348	0.025732	0.0109216	0.00885388	0.00551392	0.00528768			0.016154	0.0130736	0.0116489	0.021467	0.0215419	0.0177392	0.0322904	0.0221598	0.0101899	0.0235478	0.0275252	0.0151809	0.020996	0.0496449	0.0280046	0.0148531	0.0229879	0.0171396	0.0245052	0.00720056	0.0306483	0.0344086	0.0407521	0.0273922	0.0367578	0.0262505	0.041179
BHVO-1 Day 2	0.00561283	0.00615669	0.00811006	0.0147556	0.0208578	0.00709241	0.0143526	0.00779378	0.00665396	0.0427027	0.0245172	0.00738551	0.0157535	0.0114133	0.00648522	**	**	0.0320952	0.029516	0.00494474	0.0228361	0.0277242	0.00699936	0.114262	0.0227116	0.0137075	0.0148792	0.0278579	0.0193341	0.0406232	0.0373435	0.0287886	0.0177676	0.0149627	0.0295623	0.0298972	0.0246633	0.00635497	0.0260511	0.00820226	0.03706	0.00169681	0.0218636	0.0233437
JB-1a Day 2	0.00722904	0.0126204	0.0146998	0.00699555	0.00989673	0.00851378	0.0139015	0.0103843	0.0119617	0.0578148	0.0173104	0.020643	0.00954168	0.00144028	0.00439305			0.0289016	0.0203638	0.0134242	0.0245581	0.0121731	0.0112077	0.0483811	0.00954197	0.0131782	0.0141013	0.010783	0.0148427	0.0179779	0.0190855	0.0310281	0.0146187	0.0264803	0.0285594	0.0154719	0.0197227	0.0163324	0.0331753	0.0267514	0.02923	0.0072576	0.0155776	0.0131471
BHVO-1 Day 3 (whole rock)											0.0197898	0.0167696	0.0187495	0.012569	0.017973			0.0300777	0.0334328	0.0152284	0.0316192	0.0187144	0.0183123	0.0781148	0.0176434	0.020738	0.0168755	0.0197927	0.0216879	0.0244047	0.0284873	0.022485	0.0208112	0.0263267	0.0213393	0.0306251	0.0303875	0.0375192	0.0478514	0.0296788	0.0235587	0.026159	0.019926	0.0165391
JB-1a Day 3 (whole rock)											0.0285688	0.0137245	0.0188771	0.0163825	0.0242229			0.0230089	0.0279423	0.0111958	0.01948	0.0226004	0.0119128	0.0238517	0.0099029	0.0135988	0.0166973	0.0183689	0.00972398	0.0186914	0.0208318	0.0165993	0.0263447	0.0301424	0.0155393	0.0186519	0.0229448	0.0169052	0.0388251	0.0232043	0.0199528	0.0191704	0.0245109	0.0198344
Accuracy (Deviation from preferred value, %)
BHVO-1 Day 1	-0.00529681	0.0191108	0.0243777	-0.0173299	-0.00178287	-0.0101016	0.00941039	-0.0547187	-0.0265852	-0.0831293	0.0317822	0.00101424	0.00461235	-0.0022033	0.00922129	**	**	0.00526217	0.000722401	0.0379154	0.0520631	-0.0076491	0.00908343	-0.0722838	0.0272439	0.0747479	0.0355393	0.0330768	0.0579645	0.0972561	0.096205	0.0632346	0.0692687	0.100797	0.0991106	0.0975255	0.0571614	0.0847008	0.0759055	0.0600876	0.0838115	0.0536256	0.072942	0.126234
JB-1a Day 1	0.00379715	-0.00947089	-0.00353059	0.0207991	0.0681946	0.00221643	-0.0185369	0.0157914	-0.00886851	-0.0263379	-0.0279542	0.0112011	0.0541679	0.0146935	0.0417258			0.097699	0.0240118	0.0255938	-0.00440058	-0.0682956	0.0209956	0.0442422	0.0531704	0.0356958	0.0474928	0.0250772	0.0380031	0.0549277	0.070861	0.0330894	0.0675912	0.0778097	0.0623415	0.0491727	0.0305204	0.0446581	-0.0323197	0.0327454	0.0432016	0.0630398	0.0632032	0.0462143
BHVO-1 Day 2	-0.00494561	0.0079317	0.00669287	0.00346009	0.00790117	0.00258875	0.00286146	-0.0306513	-0.0368897	-0.0649219	0.0286387	-0.00857942	-0.00945262	0.00723526	0.00823449	**	**	0.00594546	-0.0143591	0.00391086	0.0320627	0.00581369	0.0356379	0.028869	0.0330588	0.0858508	0.0288012	0.0185008	0.0407019	0.0138124	0.0541653	0.0861356	0.0341933	0.0457775	0.0318859	0.0225927	0.0689097	0.0686099	0.0600883	0.0407114	0.0391527	0.0214063	0.118314	0.102604
JB-1a Day 2	0.0185602	-0.0295905	-0.0438522	0.0210712	0.0523715	0.000206697	-0.0396089	0.0283445	-0.010907	0.0292253	-0.0849384	0.0146755	0.0425966	0.0116206	0.0340857			0.0321393	0.0139433	-0.0370265	-0.107369	-0.116618	0.0129153	0.0449869	0.0307757	-0.0117293	0.0134327	-0.046295	-0.043926	-0.0574602	-0.0271036	-0.0296955	-0.0525995	-0.0710518	-0.0735293	-0.102344	-0.0533769	-0.0630788	-0.082925	-0.0709932	-0.0531788	-0.0135167	0.00964221	0.028636
BHVO-1 Day 3 (whole rock)											-0.0343189	0.0246683	0.0443621	-0.00779711	-0.00295291			0.0271832	-0.0270309	-0.00421573	-0.0358113	-0.0355279	0.000644024	-0.051544	-0.000796939	-0.00814023	0.0365616	0.0173725	0.00209233	0.00193995	0.0114249	-0.0159239	-0.0406855	-0.0215947	-0.0368484	-0.0254836	-0.00231455	-0.00457978	0.0107105	-0.0258793	0.0188612	0.0198603	0.0047734	-0.018567
JB-1a Day 3 (whole rock)											0.00510688	-0.000943445	0.0272774	-0.00250544	0.0249542			0.0947607	-0.00296664	0.00818034	-0.00127473	-0.0170048	0.0218475	-0.0351581	0.0147353	0.0113186	0.0257675	0.0267856	0.0209087	0.0228632	0.00777479	0.0343871	0.0027645	0.00904266	-0.00580325	0.00203427	0.0173914	-0.00551836	0.0214203	0.0271496	0.0292027	0.0125655	0.0348178	-0.0191238
* GeoReM preferred values were retrieved on March 31 2020, at http://georem.mpch-mainz.gwdg.de/sample_query_pref.asp, and correspond to the values reported in Jochum K.P. et al. (2016), Reference values following ISO guidelines for frequently requested rock reference materials, Geostandards and Geoananalytical research, DOI:10.1111/j.1751-908X.2015.00392.X
** Cu and Zn are not accurate on fused powder glasses. See further quality control data for minerals.
Information on mineral standards analyzed as quaity assurance standards (Smithsonian Institution olivine & diopside) and the accepted values can be found in the respective sheets for each mineral.
The following geologic standards are used to calibrate our LA-ICP-MS system
BCR-2G
BHVO-1
BHVO-2G
BIR-1
BIR-1G
GSD-1G
JA-1
JA-2
JA-3
JB-1a
JB-2
JB-3
NIST 612
NKT-1G
RGM-2
STM-1
SY-2
TB-1G
W-2
